# Supplementary material
Source: Elsevier journal article supplement (https://comptes-rendus.academie-sciences.fr/chimie/article/10.1016/j.crci.2019.06.001/file/attach/mmc1.pdf)
Supplement: mmc1 [file mmc1.pdf]

# **Novel 1,3,4-thiadiazole conjugates derived from protocatechuic acid: Synthesis, antioxidant activity, computational and electrochemical studies**

Katarina Jakovljević<sup>a</sup>, Milan D. Joksović<sup>a</sup>, Bruno Botta<sup>b</sup>, Ljiljana S. Jovanović<sup>c</sup>, Edina Avdović<sup>a</sup>, Zoran Marković<sup>d</sup>, Vladimir Mihailović<sup>a</sup>, Marijana Andrić<sup>a</sup>, Snežana Trifunović<sup>e</sup>, Violeta Marković<sup>a,\*</sup>

<sup>a</sup> Faculty of Science, Department of Chemistry, University of Kragujevac, R. Domanovića 12, 34000 Kragujevac, Serbia

<sup>b</sup> Dipartimento di Chimica e Tecnologie del Farmaco, Sapienza Università di Roma, P.le Aldo Moro 5, 00185 Roma, Italy

<sup>c</sup> Faculty of Sciences, University of Novi Sad, Trg D. Obradovića 3, 21000 Novi Sad, Serbia

<sup>d</sup> Department of Chemical-Technological Sciences, State University of Novi Pazar, Vuka Karadžića bb, 36300 Novi Pazar, Serbia

<sup>e</sup> Faculty of Chemistry, University of Belgrade, Studentski trg 16, 11000 Belgrade, Serbia

---

\* Corresponding author. *E-mail address:* [markovicvioleta@kg.ac.rs](mailto:markovicvioleta@kg.ac.rs) (V. Marković)

## **Contents:**

|                                                                                                       |               |
|-------------------------------------------------------------------------------------------------------|---------------|
| <b>Copies of <math>^1\text{H}</math> and <math>^{13}\text{C}</math> NMR spectra for 3a-o, 4 and 5</b> | <b>S3-S36</b> |
| <b>Structure of investigated compounds and corresponding atomic charge values</b>                     | <b>S37</b>    |
| <b>Values of atomic charges in all anions obtained from the 3, 4, and 5 in methanol</b>               | <b>S38</b>    |

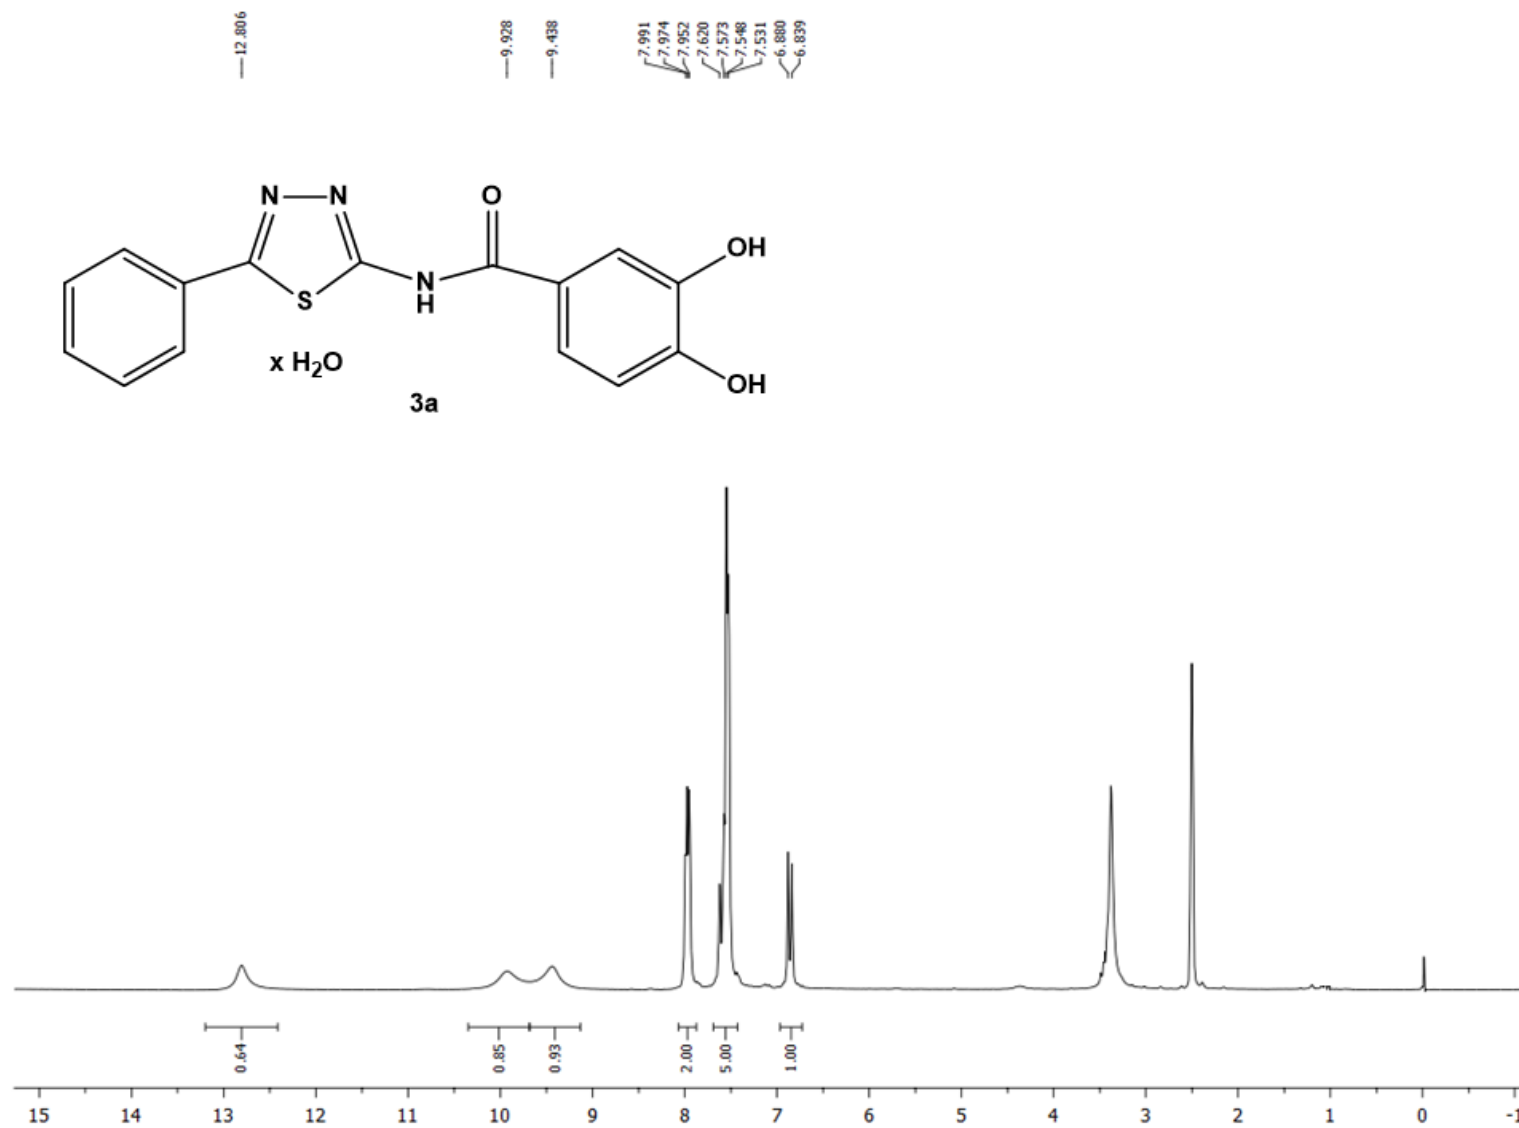

**Figure S1.** <sup>1</sup>H NMR spectrum of **3a** in DMSO-d<sub>6</sub> (200 MHz).

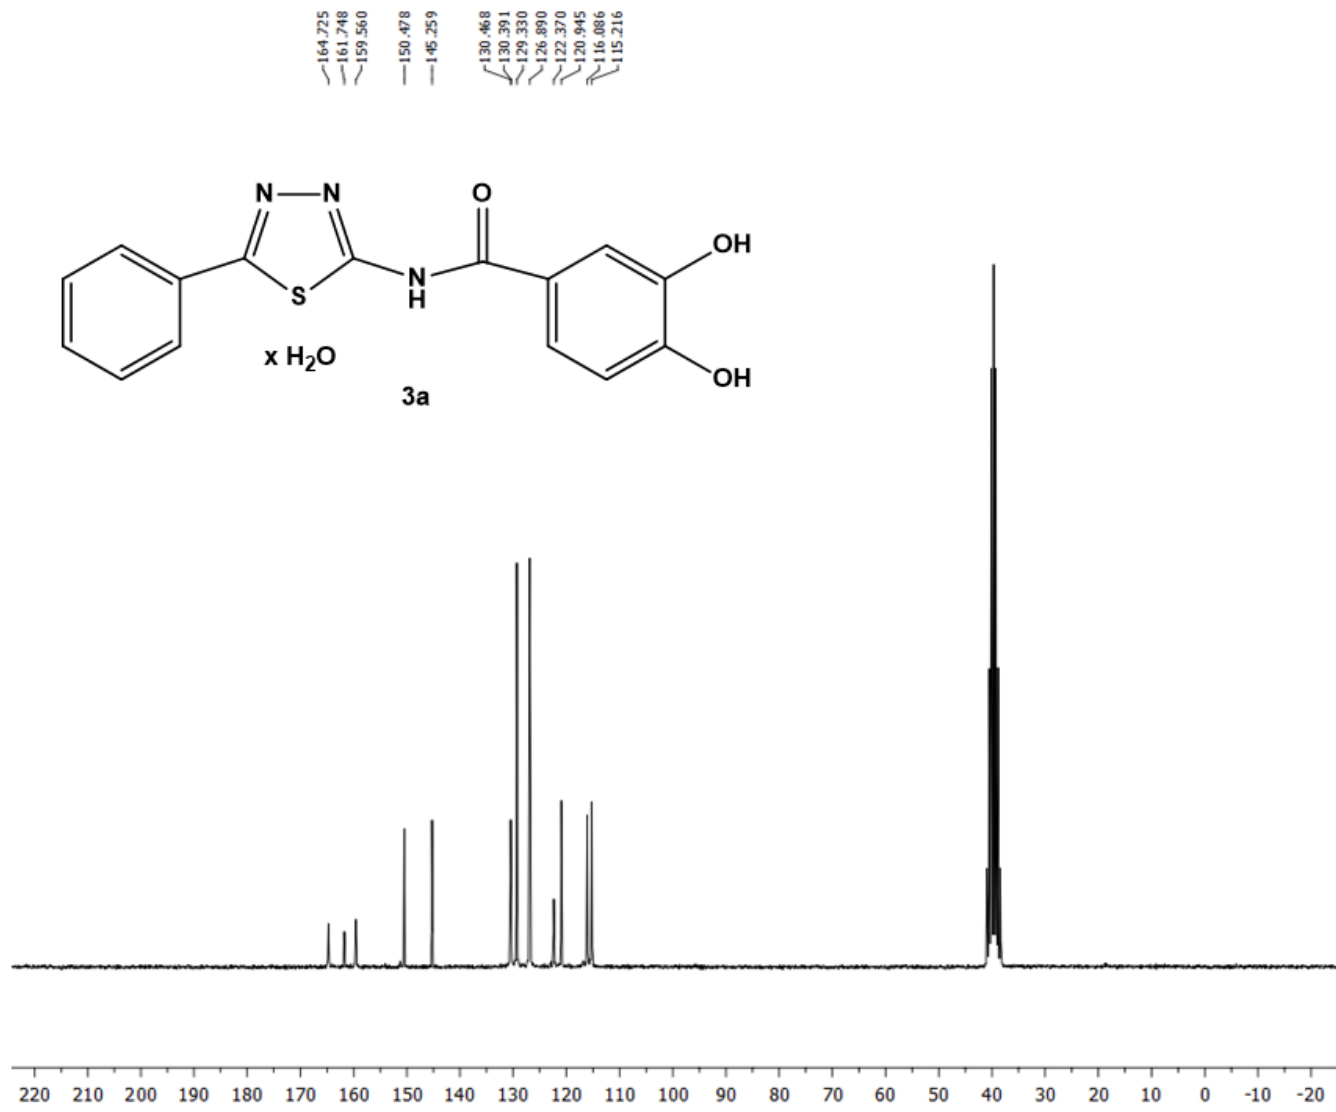

**Figure S2.** <sup>13</sup>C NMR spectrum of **3a** in DMSO-d<sub>6</sub> (50 MHz).

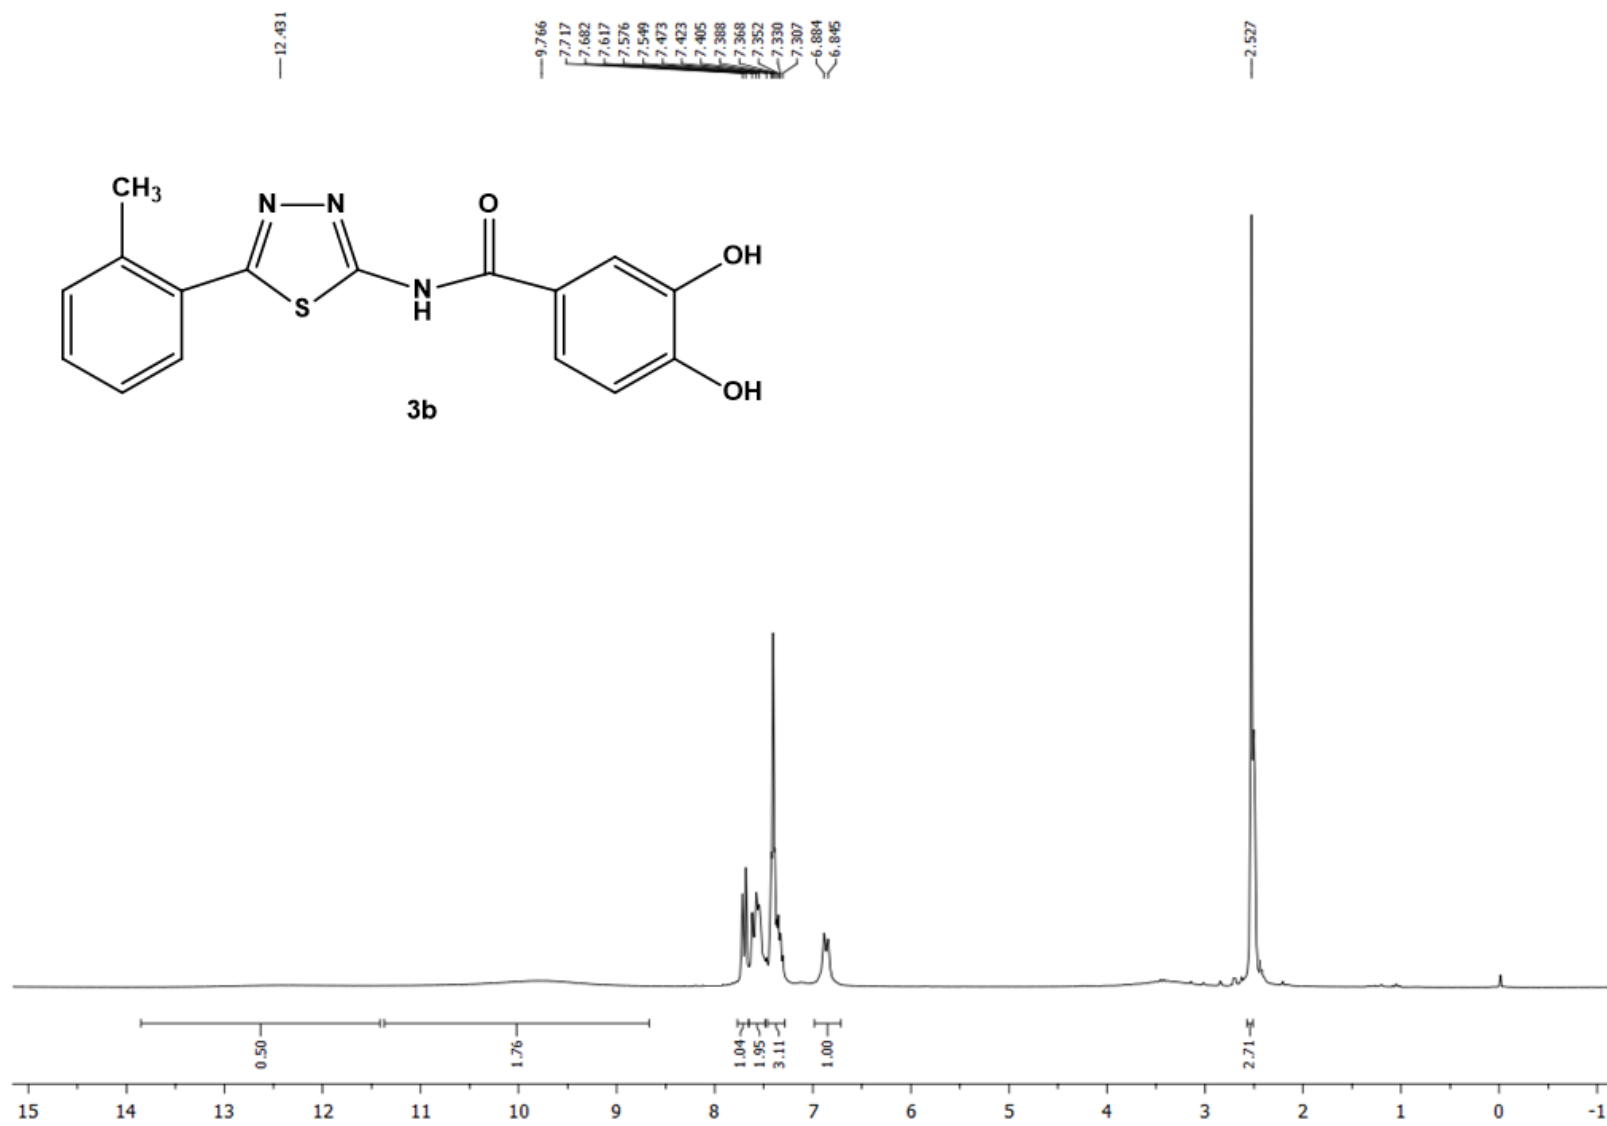

**Figure S3.**  $^1\text{H}$  NMR spectrum of **3b** in  $\text{DMSO-d}_6$  (200 MHz).

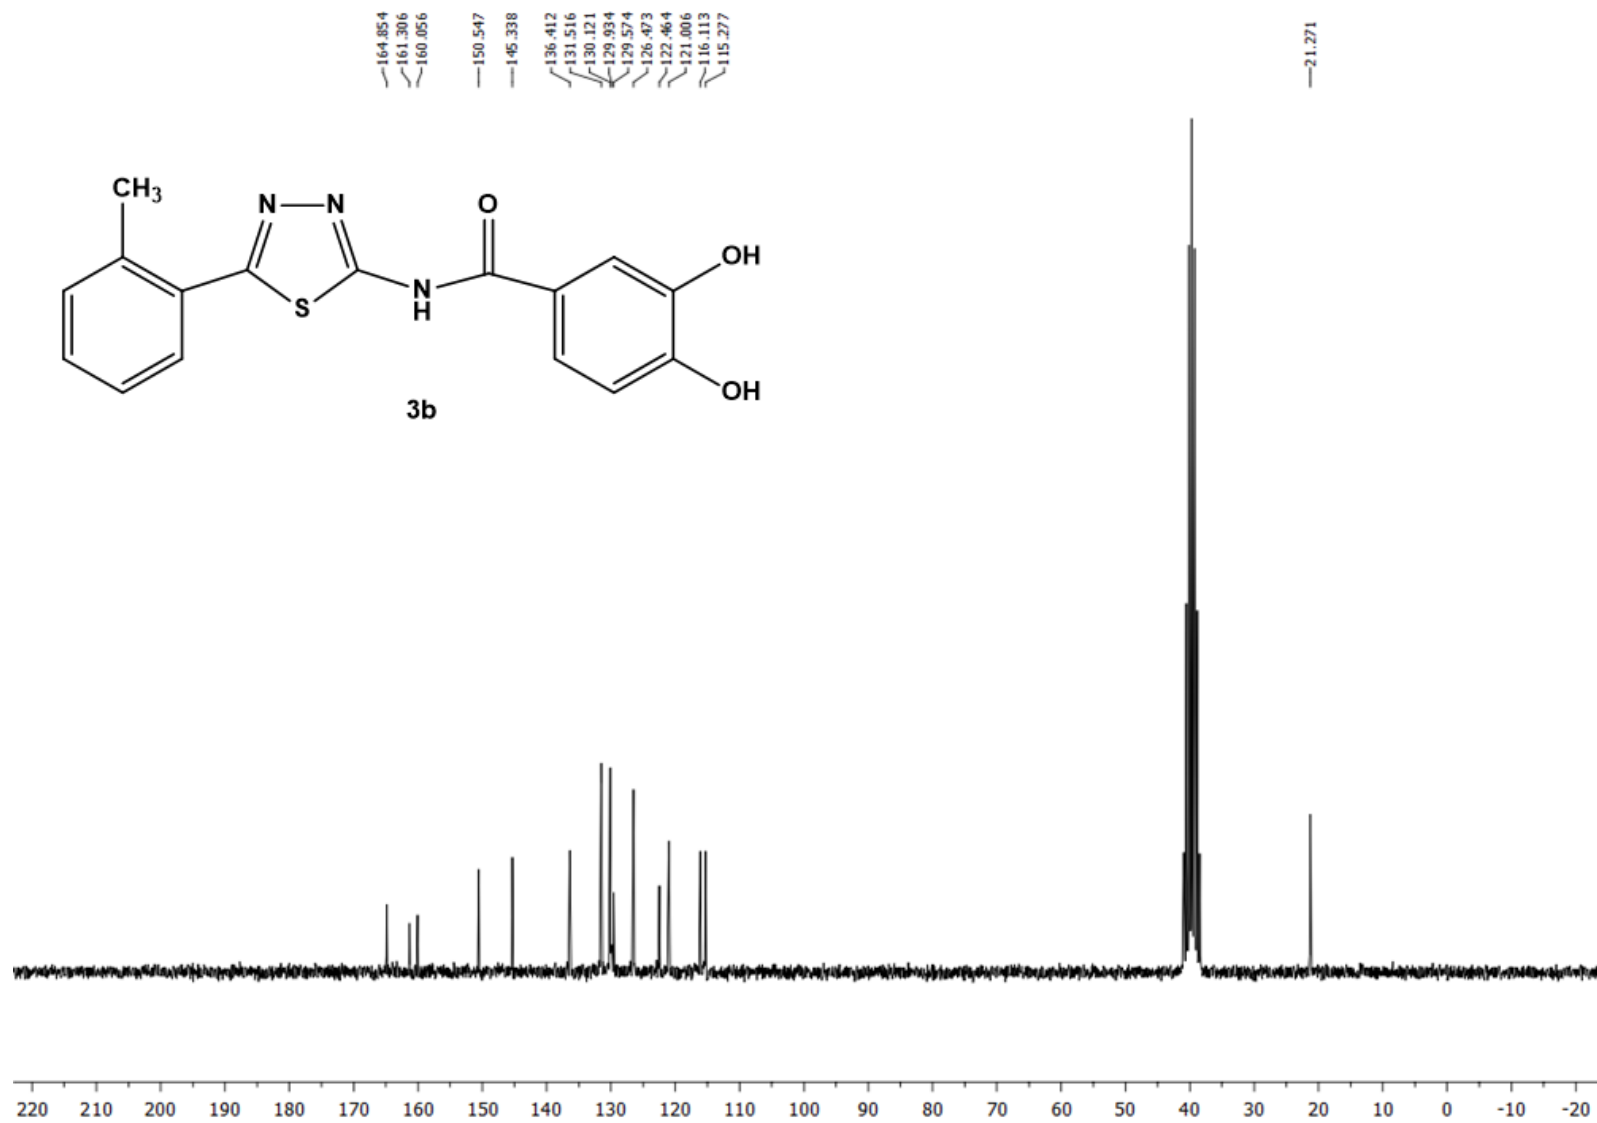

**Figure S4.**  $^{13}\text{C}$  NMR spectrum of **3b** in  $\text{DMSO-d}_6$  (50 MHz).

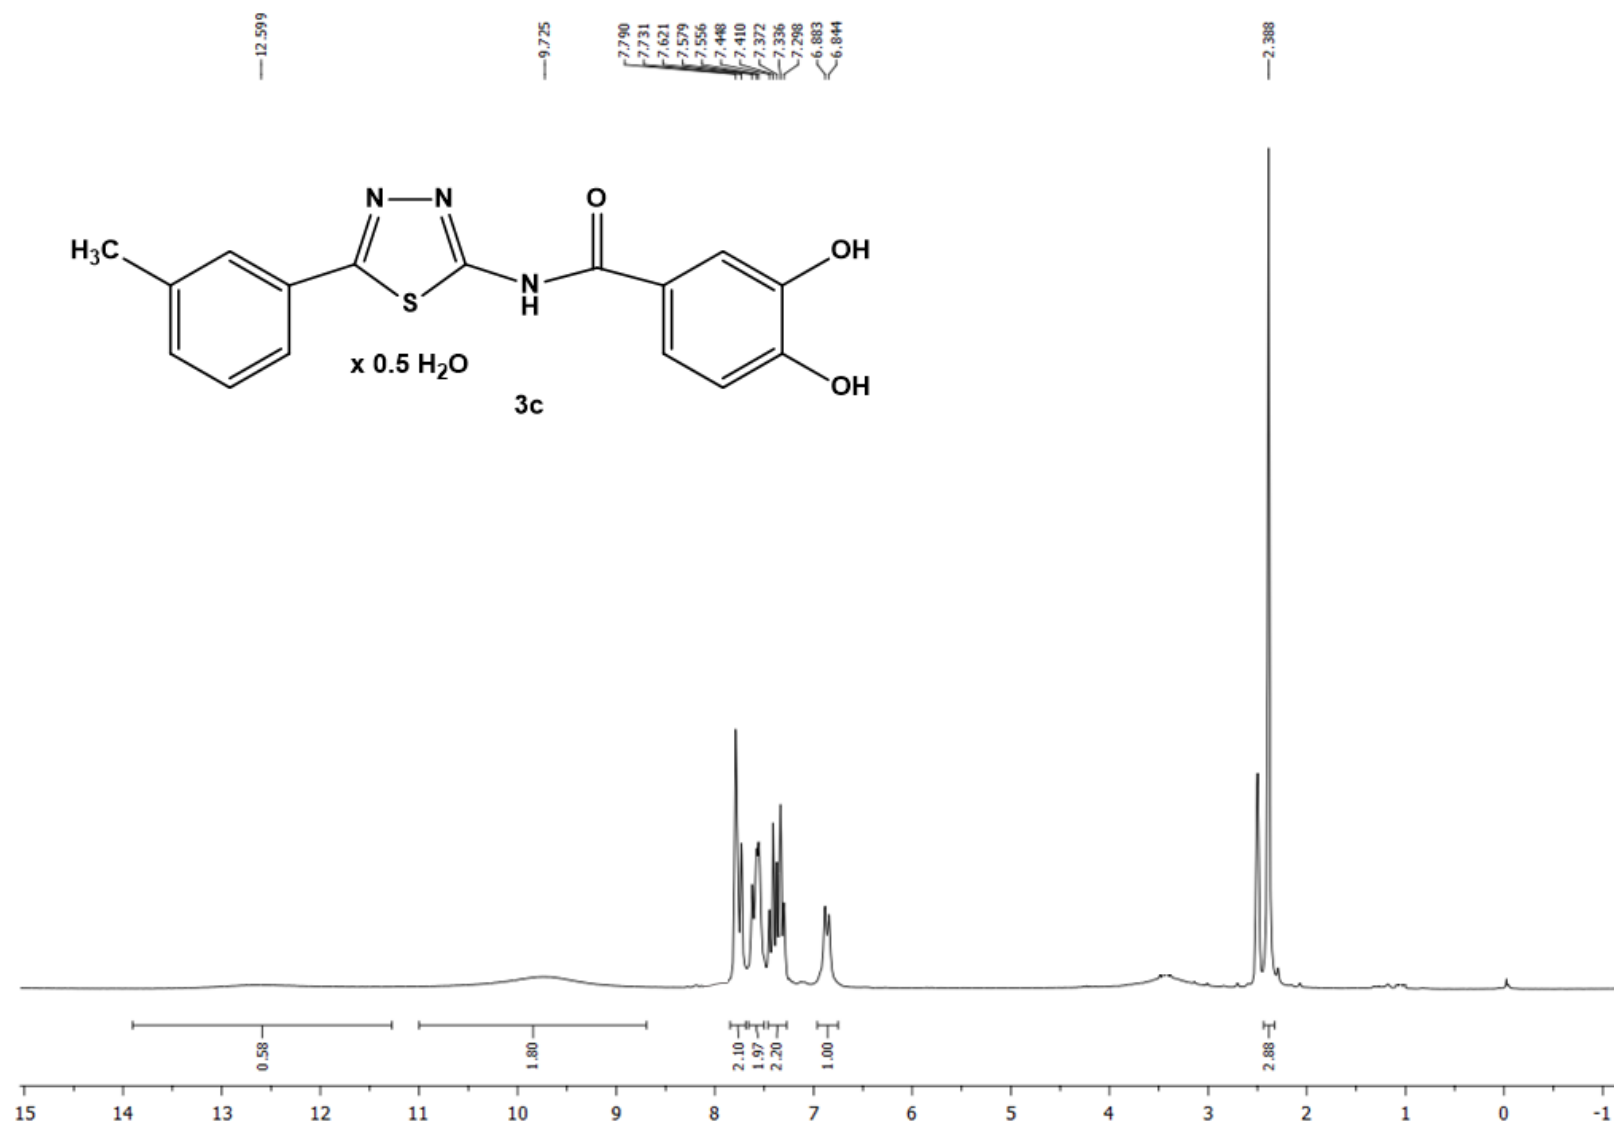

**Figure S5.** <sup>1</sup>H NMR spectrum of **3c** in DMSO-d<sub>6</sub> (200 MHz).

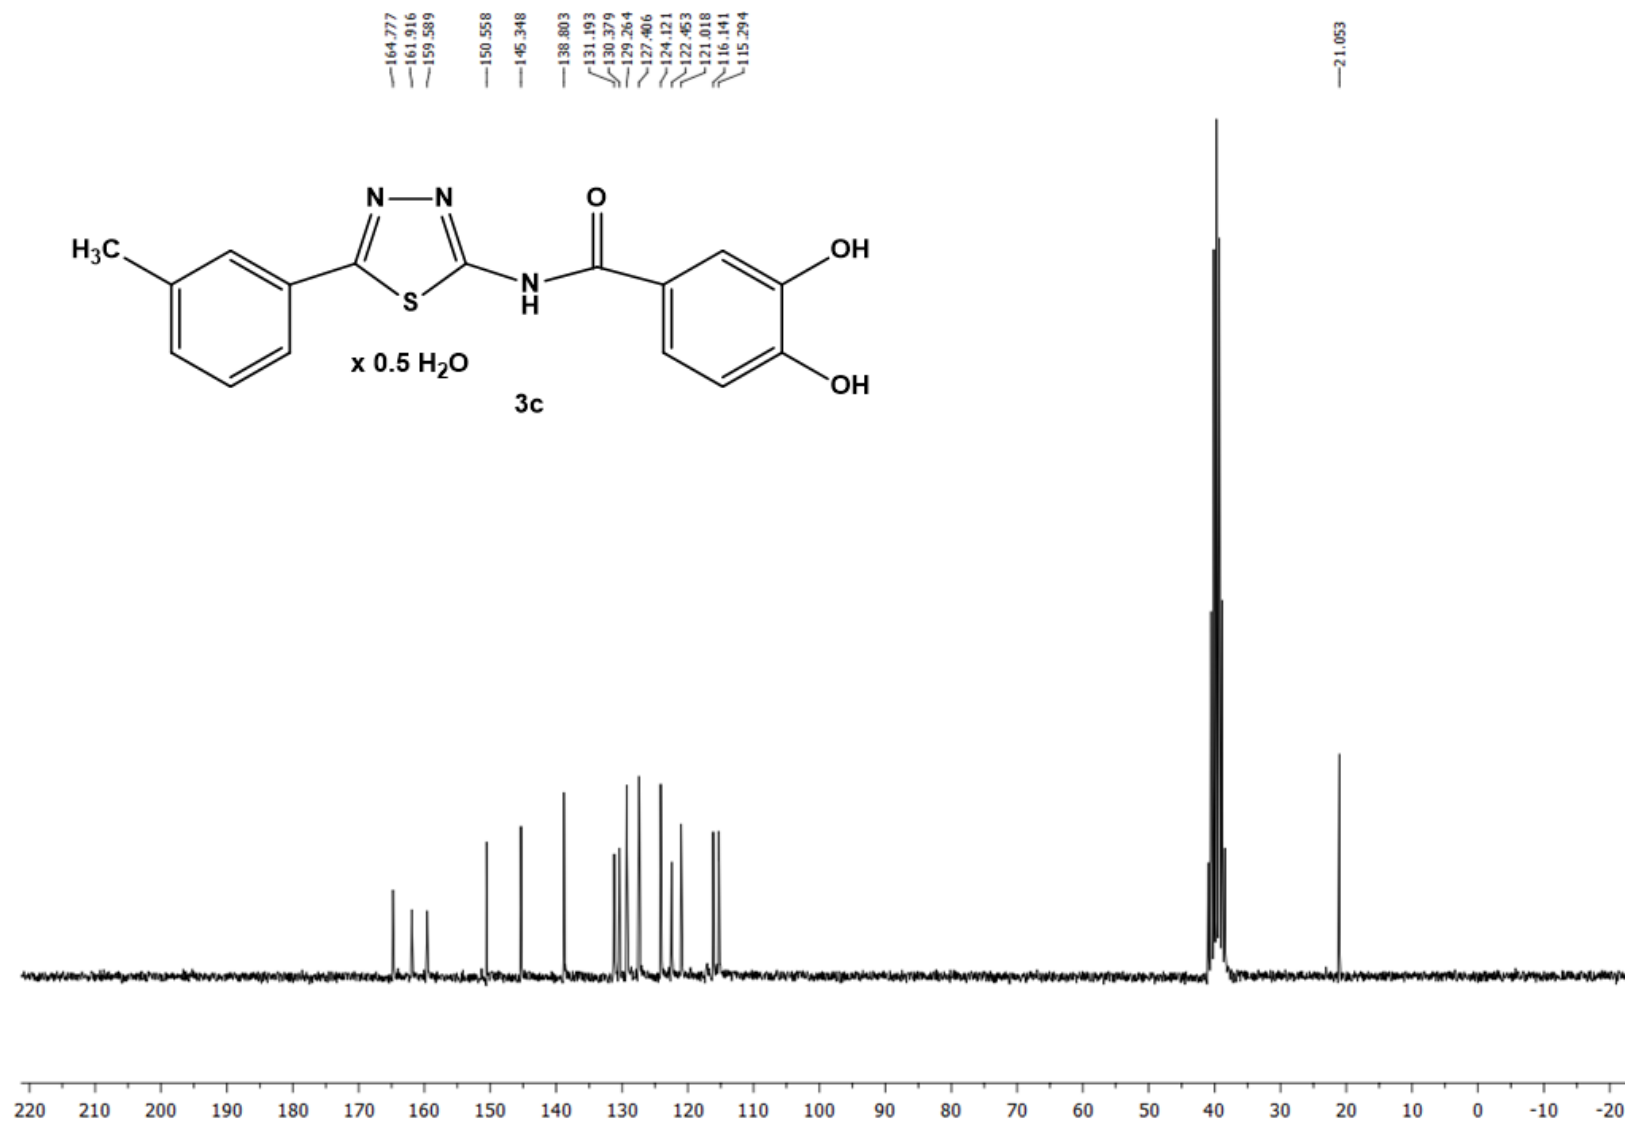

**Figure S6.** <sup>13</sup>C NMR spectrum of **3c** in DMSO-d<sub>6</sub> (50 MHz).



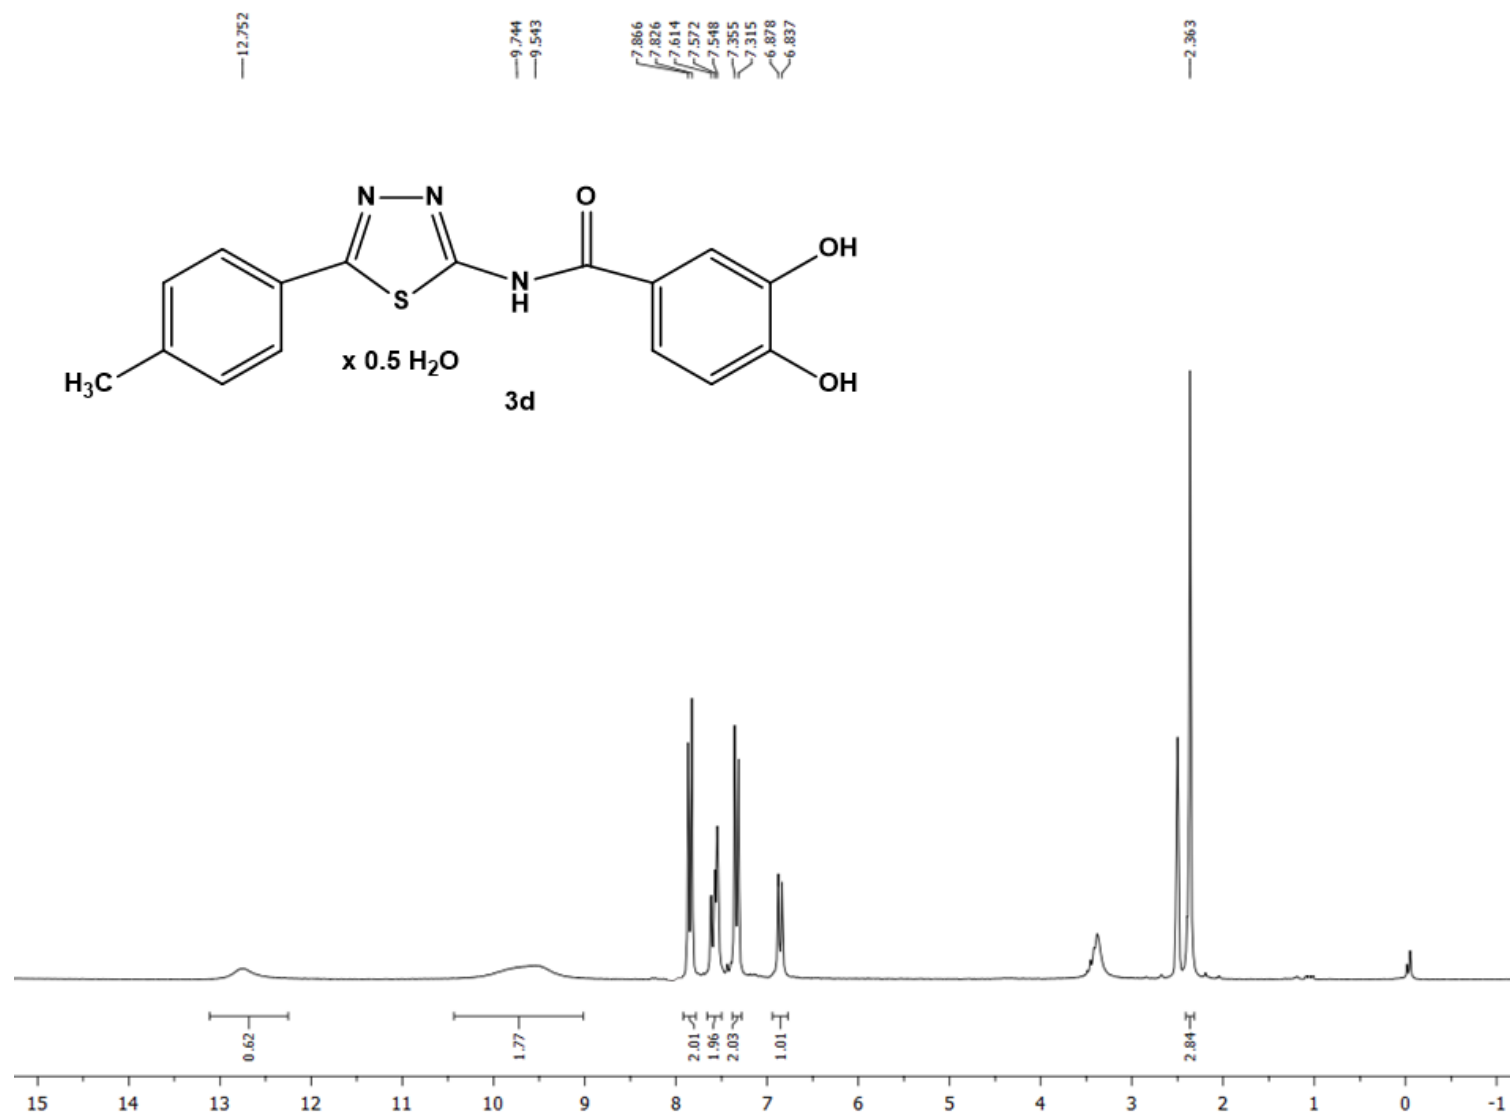

**Figure S7.** <sup>1</sup>H NMR spectrum of **3d** in DMSO-d<sub>6</sub> (200 MHz).

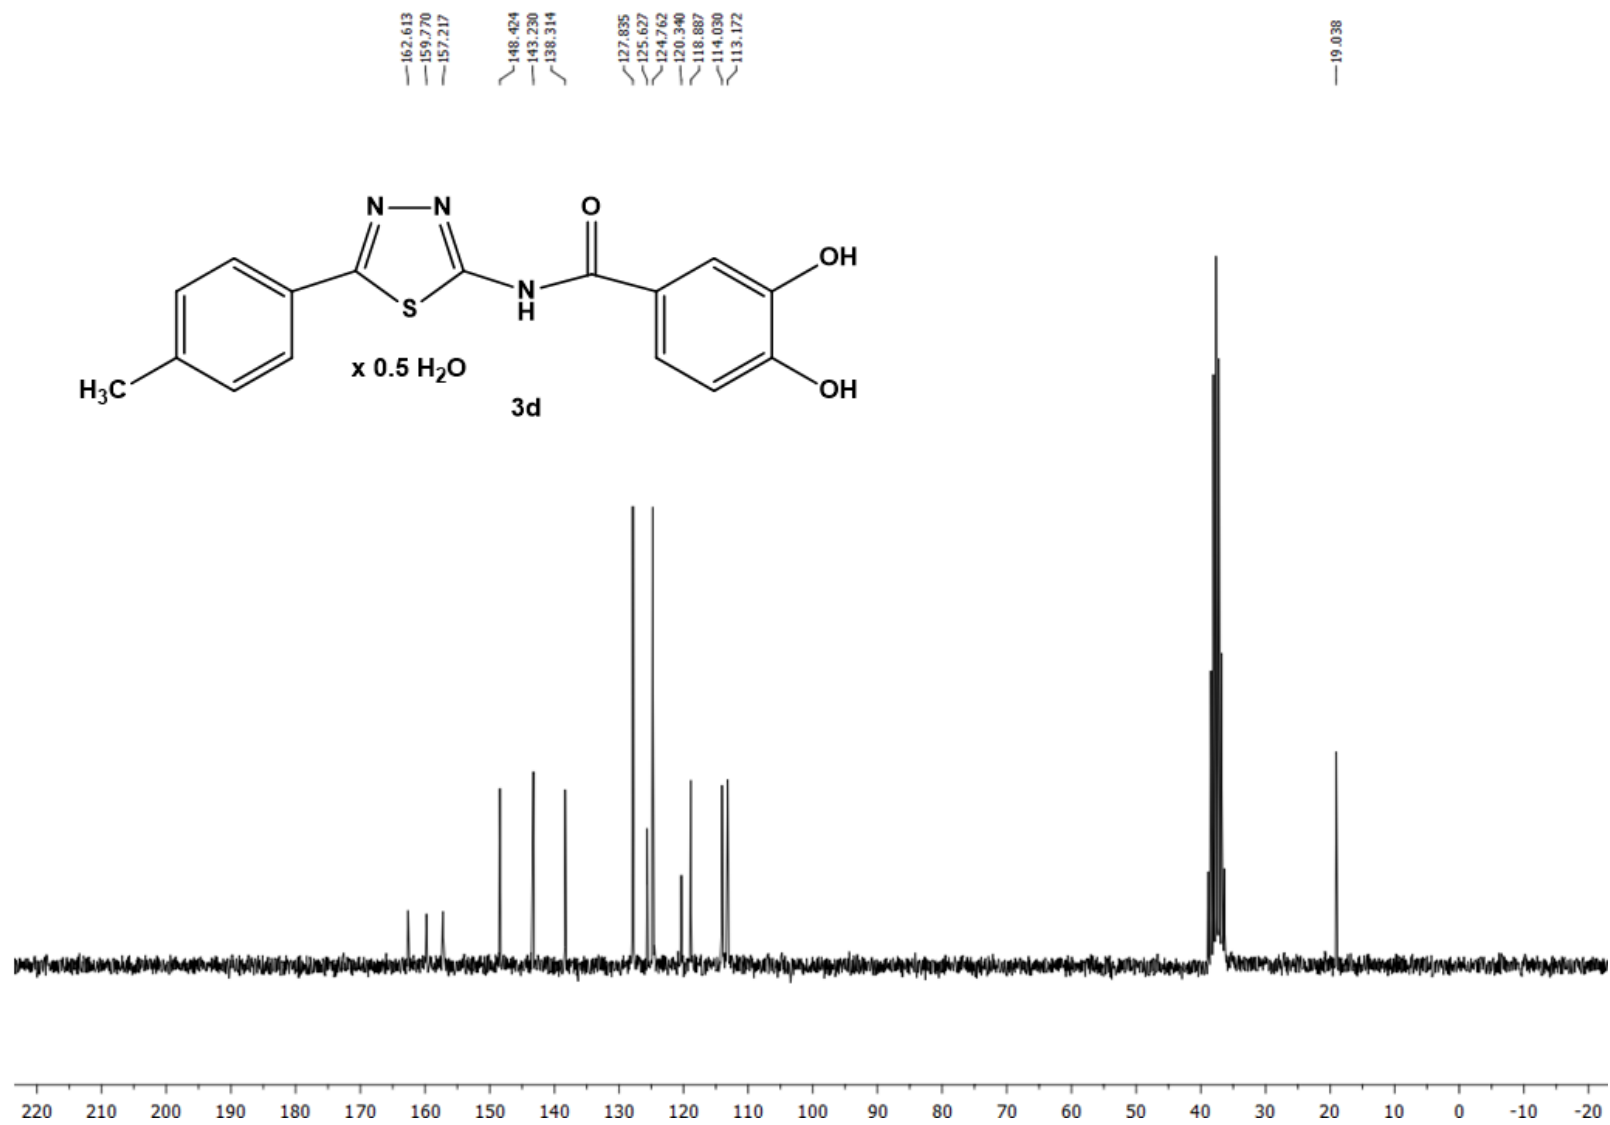

**Figure S8.** <sup>13</sup>C NMR spectrum of **3d** in DMSO-d<sub>6</sub> (50 MHz).

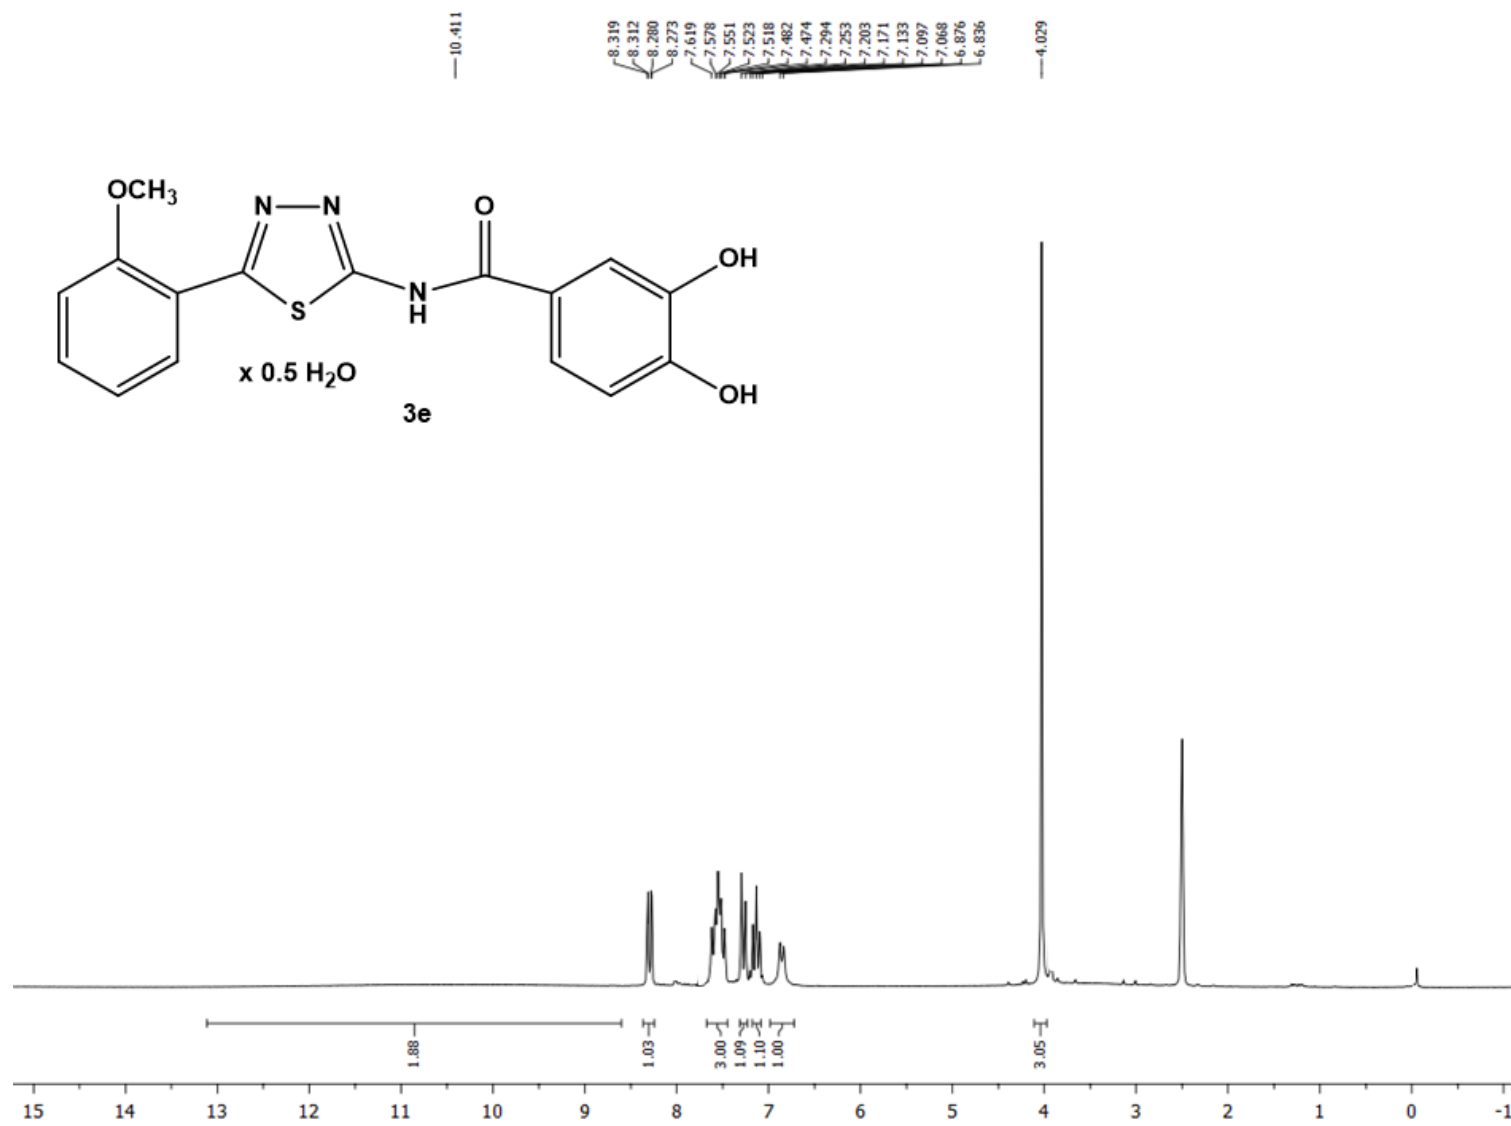

**Figure S9.** <sup>1</sup>H NMR spectrum of **3e** in DMSO-d<sub>6</sub> (200 MHz).

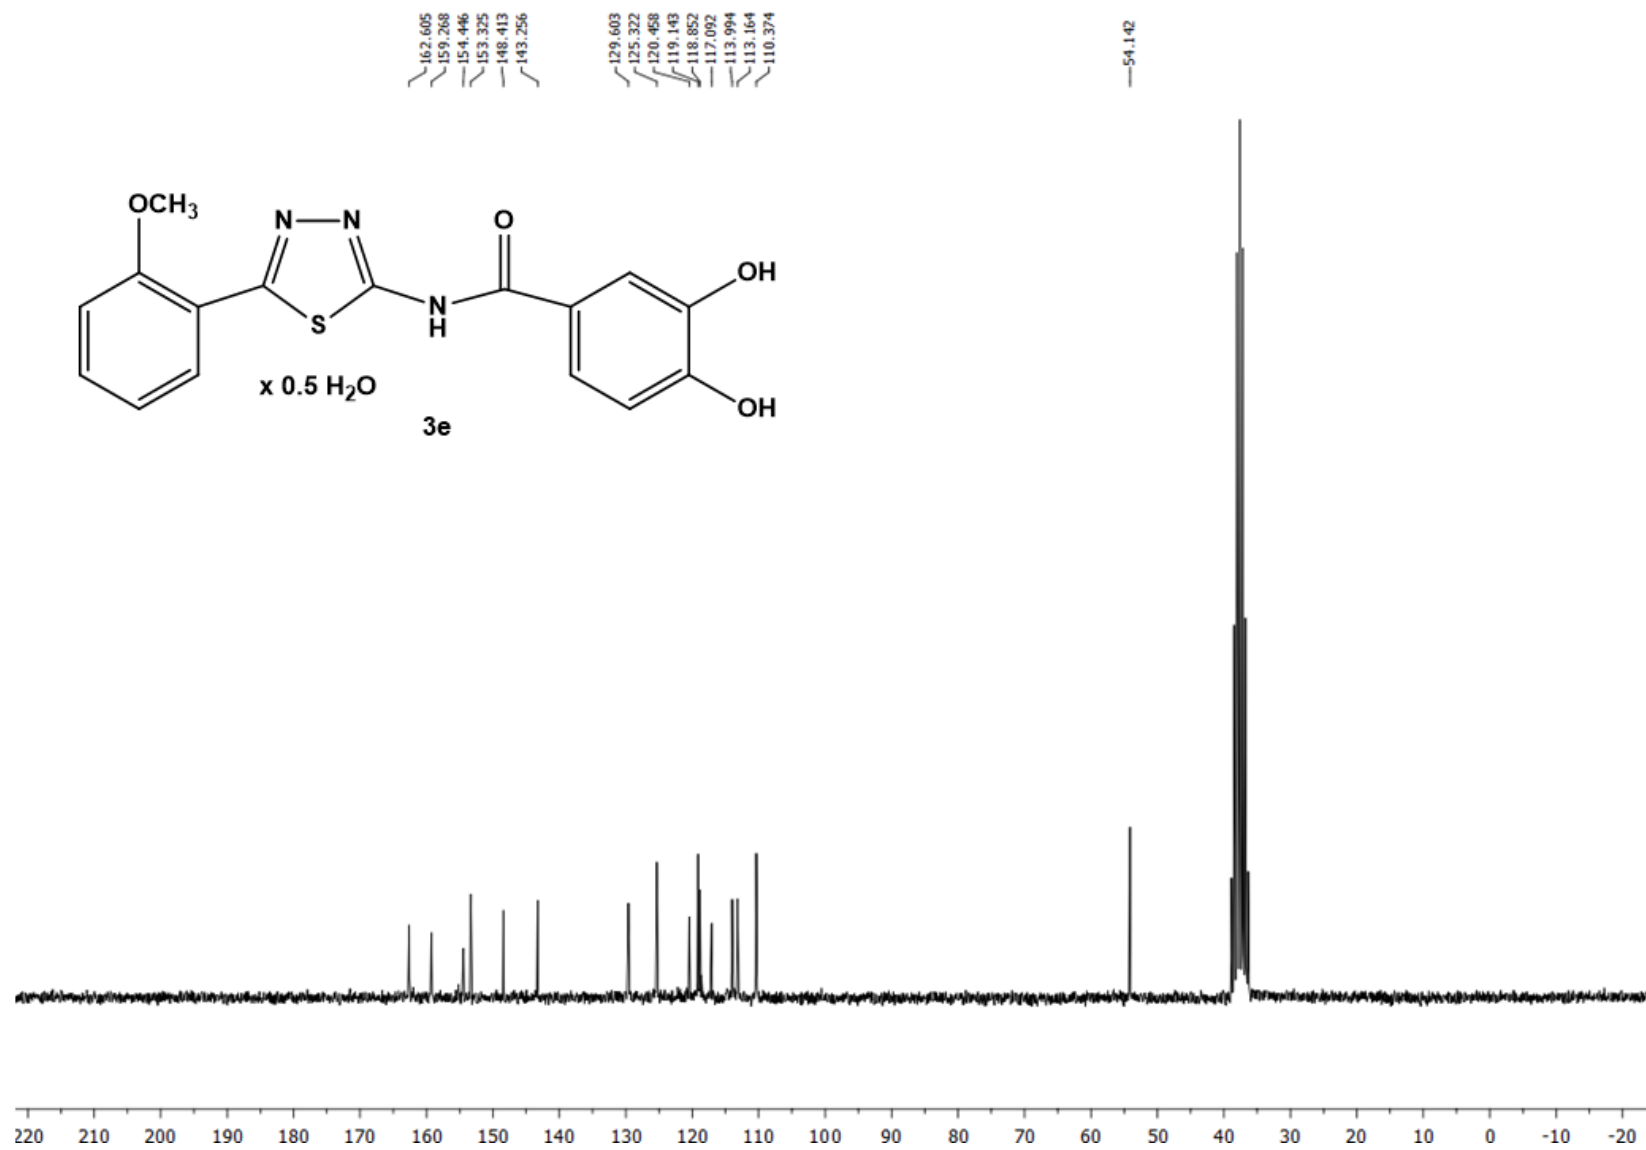

Figure S10. <sup>13</sup>C NMR spectrum of **3e** in DMSO-d<sub>6</sub> (50 MHz).

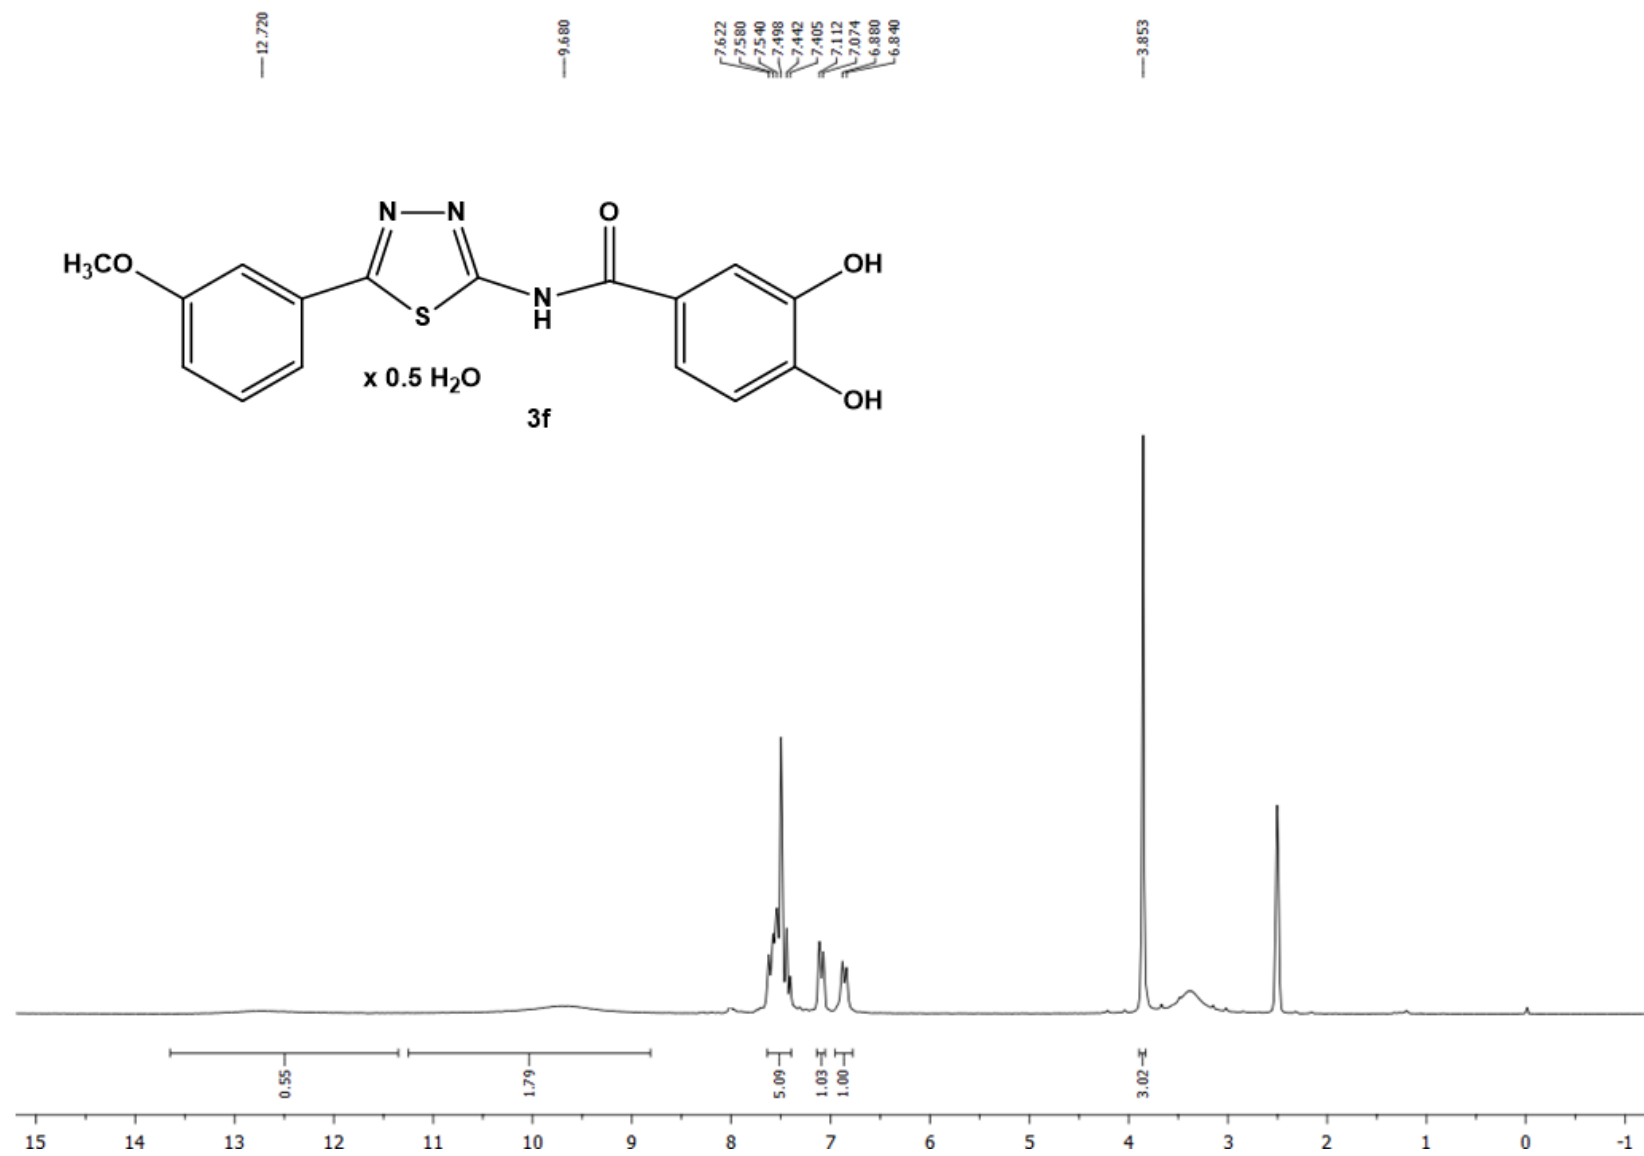

**Figure S11.** <sup>1</sup>H NMR spectrum of **3f** in DMSO-d<sub>6</sub> (200 MHz).

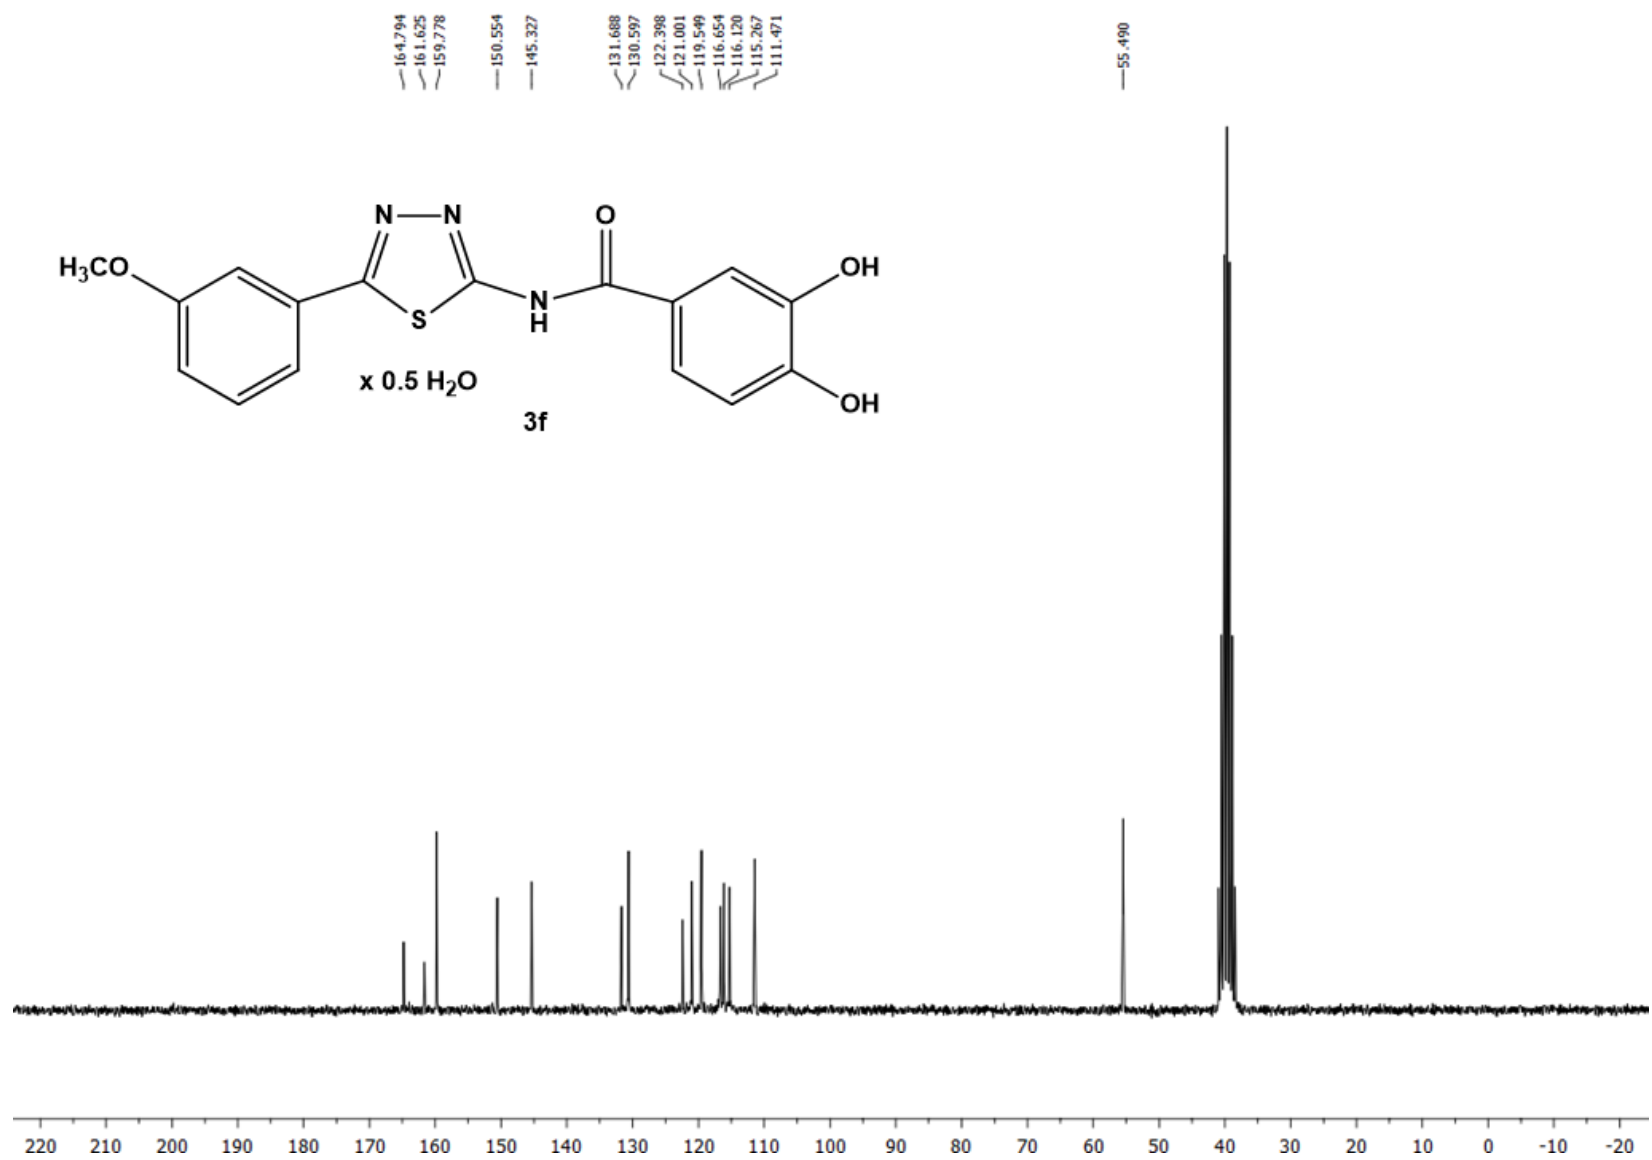

**Figure S12.** <sup>13</sup>C NMR spectrum of **3f** in DMSO-d<sub>6</sub> (50 MHz).

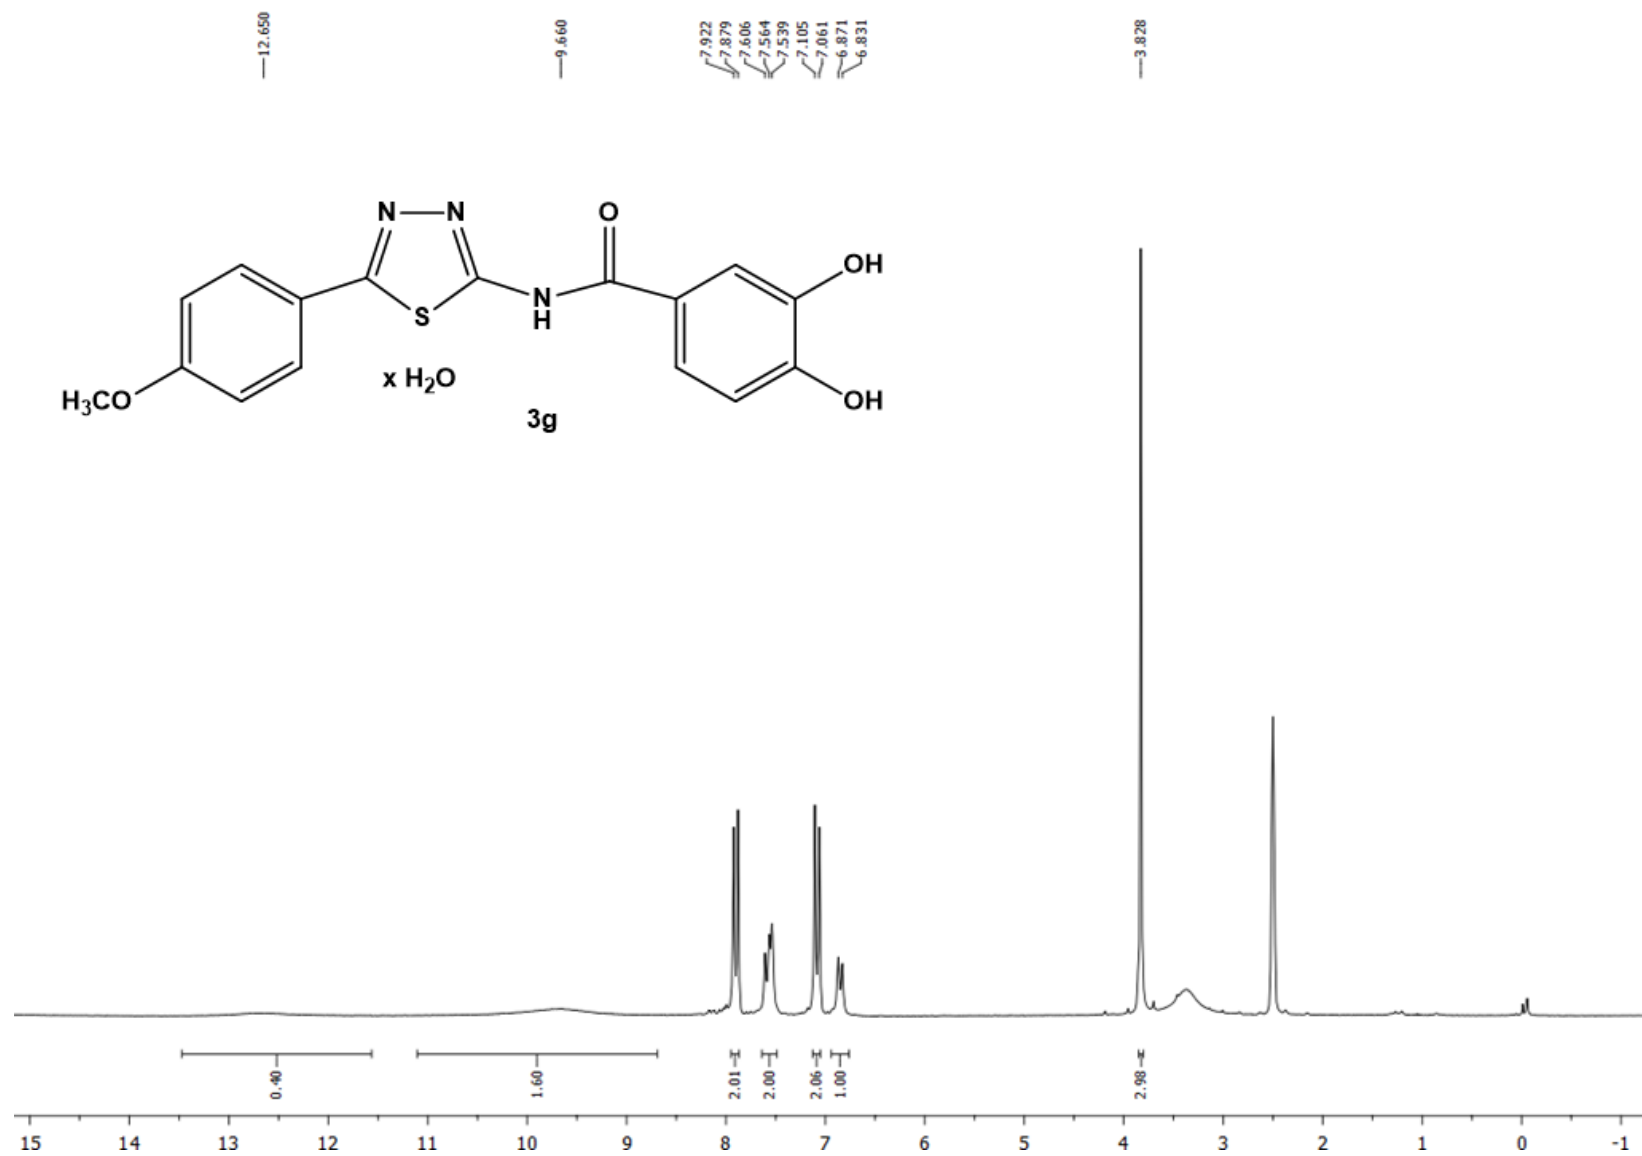

**Figure S13.**  $^1\text{H}$  NMR spectrum of **3g** in  $\text{DMSO-d}_6$  (200 MHz).

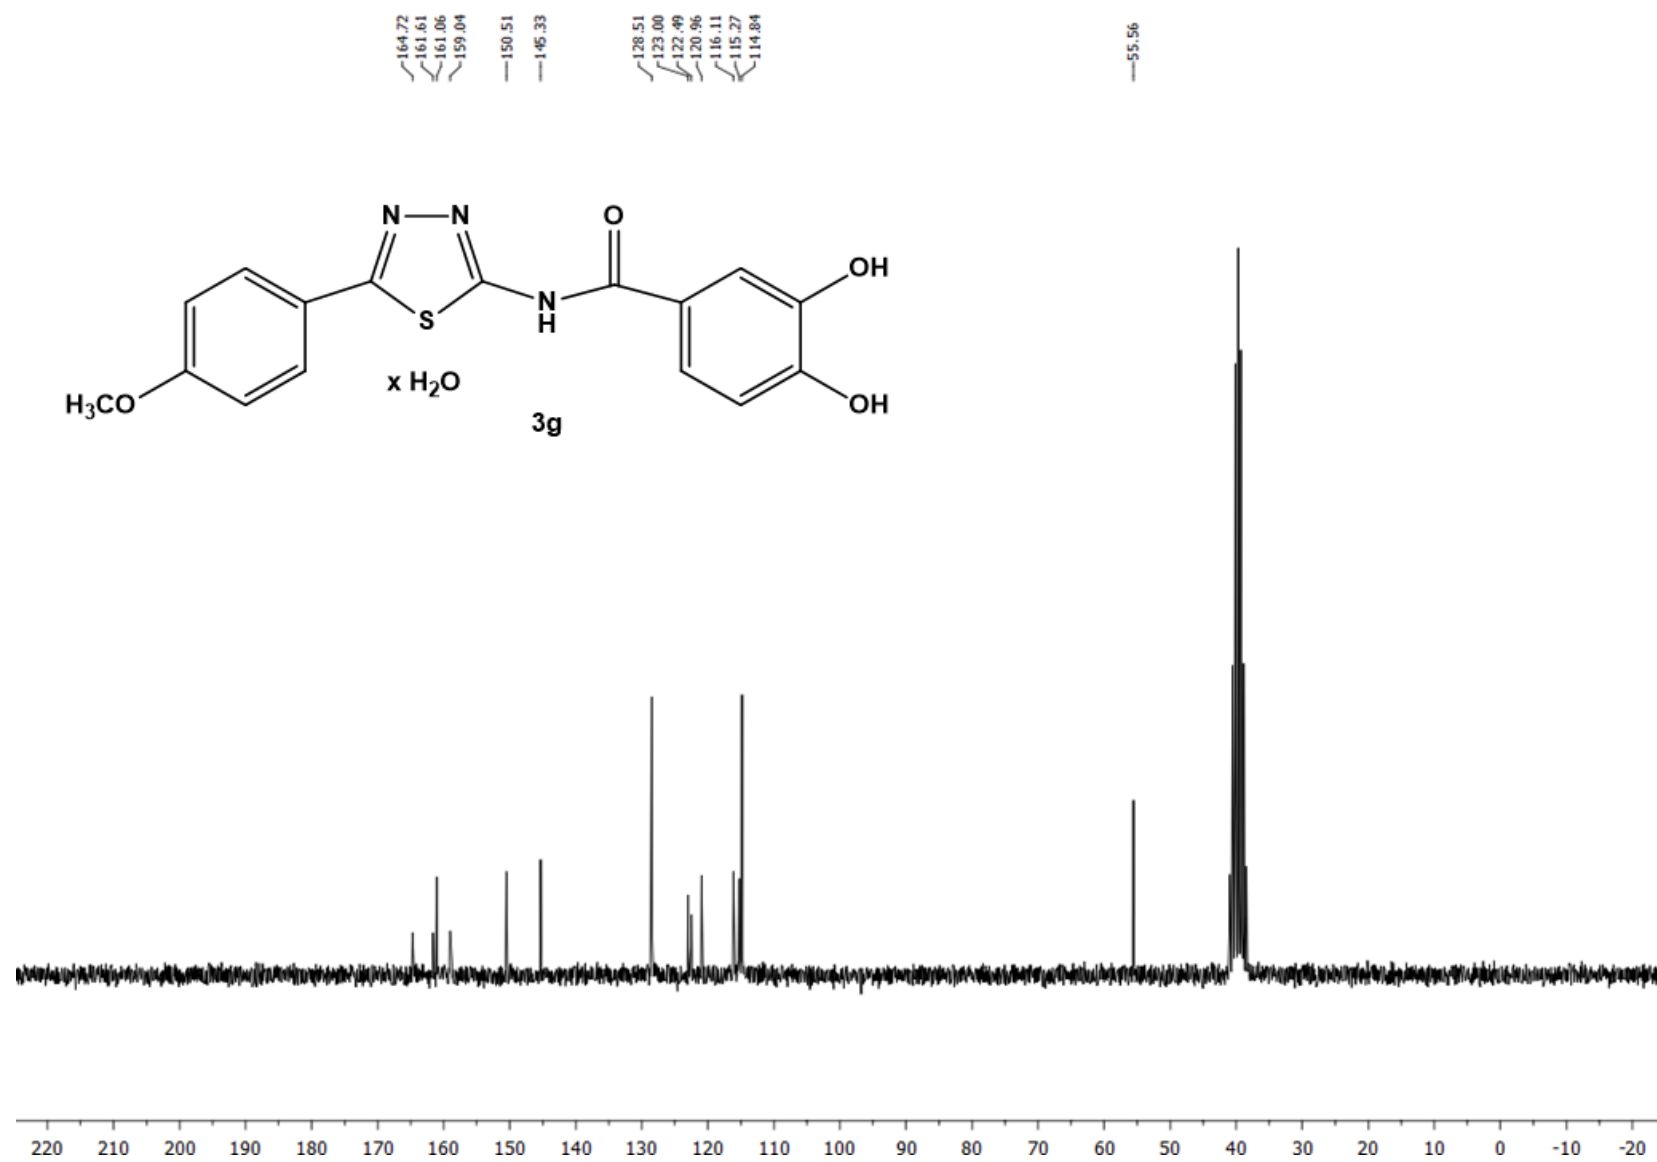

**Figure S14.**  $^{13}\text{C}$  NMR spectrum of **3g** in  $\text{DMSO-d}_6$  (50 MHz).



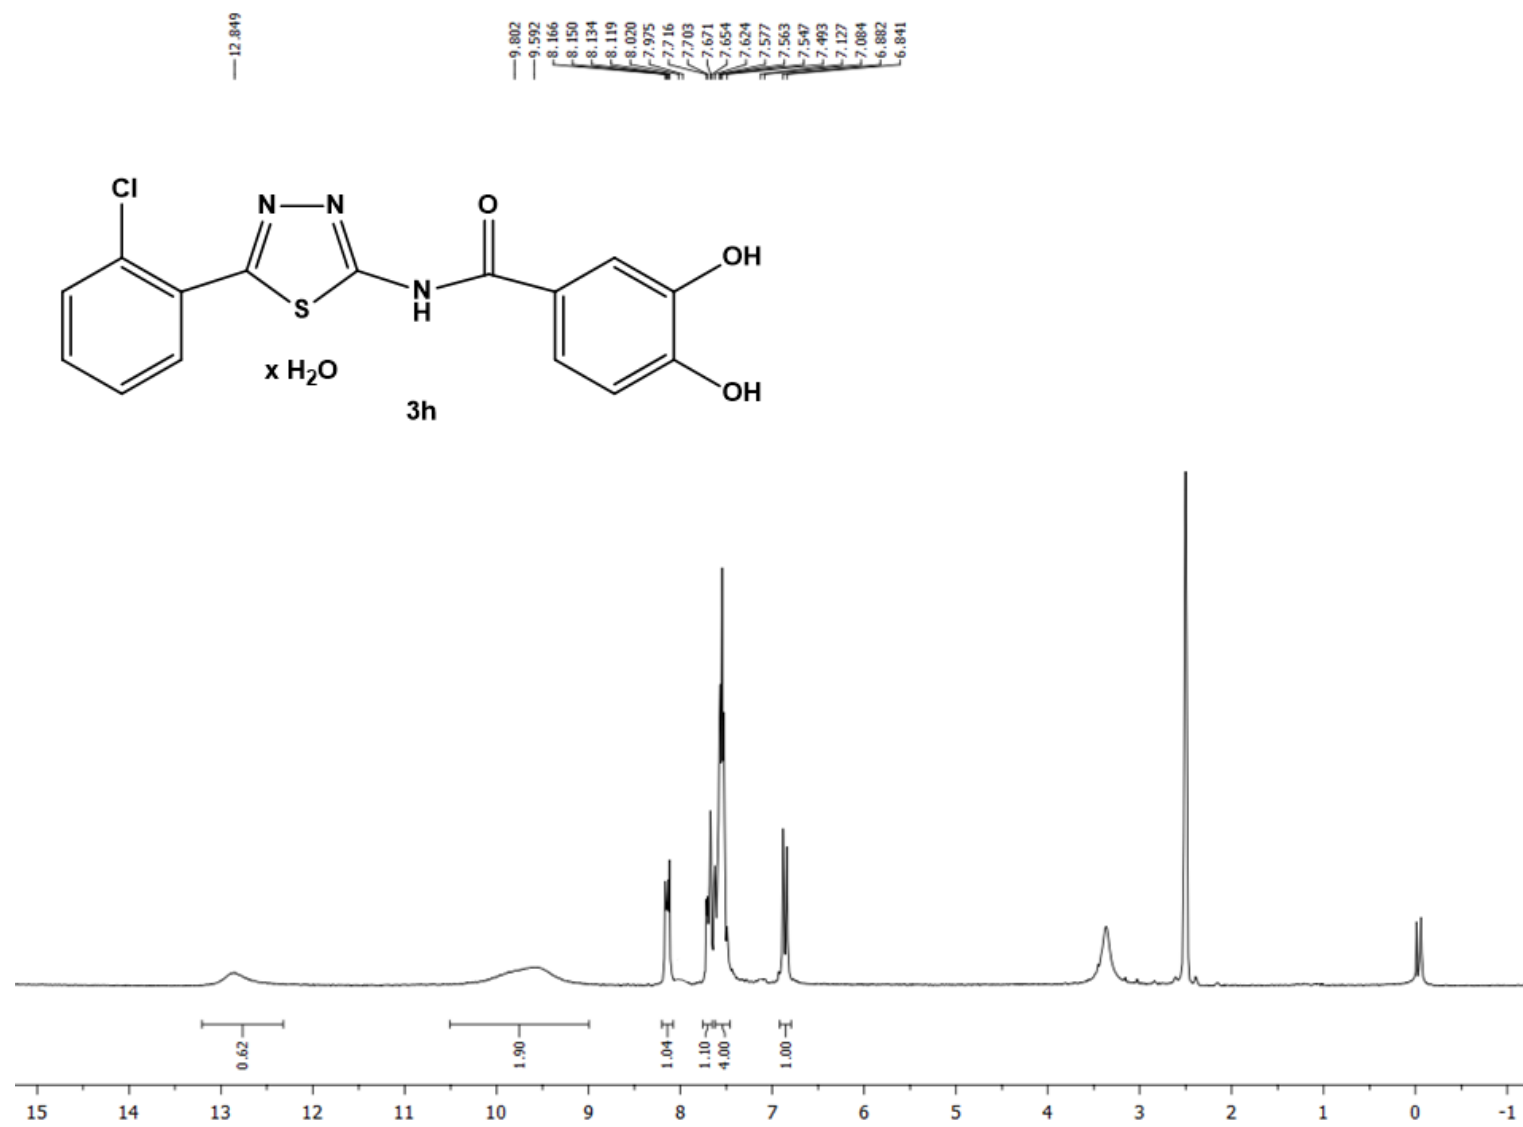

**Figure S15.** <sup>1</sup>H NMR spectrum of **3h** in DMSO-d<sub>6</sub> (200 MHz).

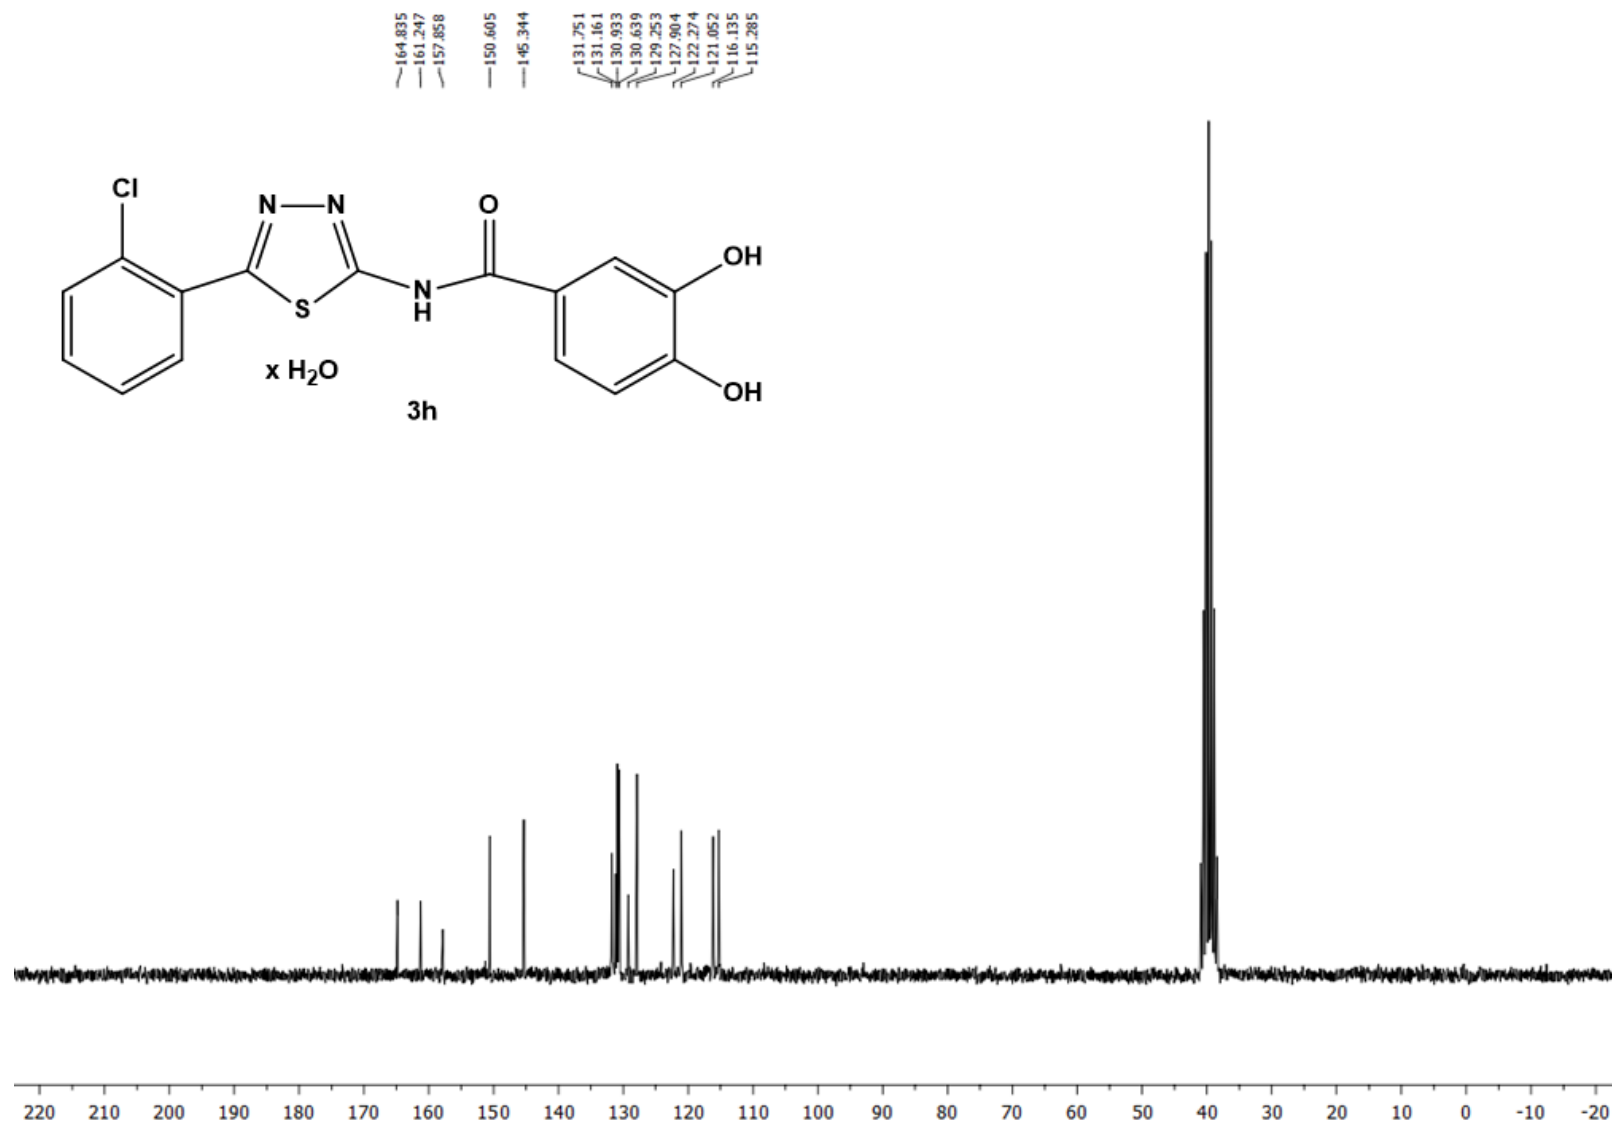

**Figure S16.** <sup>13</sup>C NMR spectrum of **3h** in DMSO-d<sub>6</sub> (50 MHz).

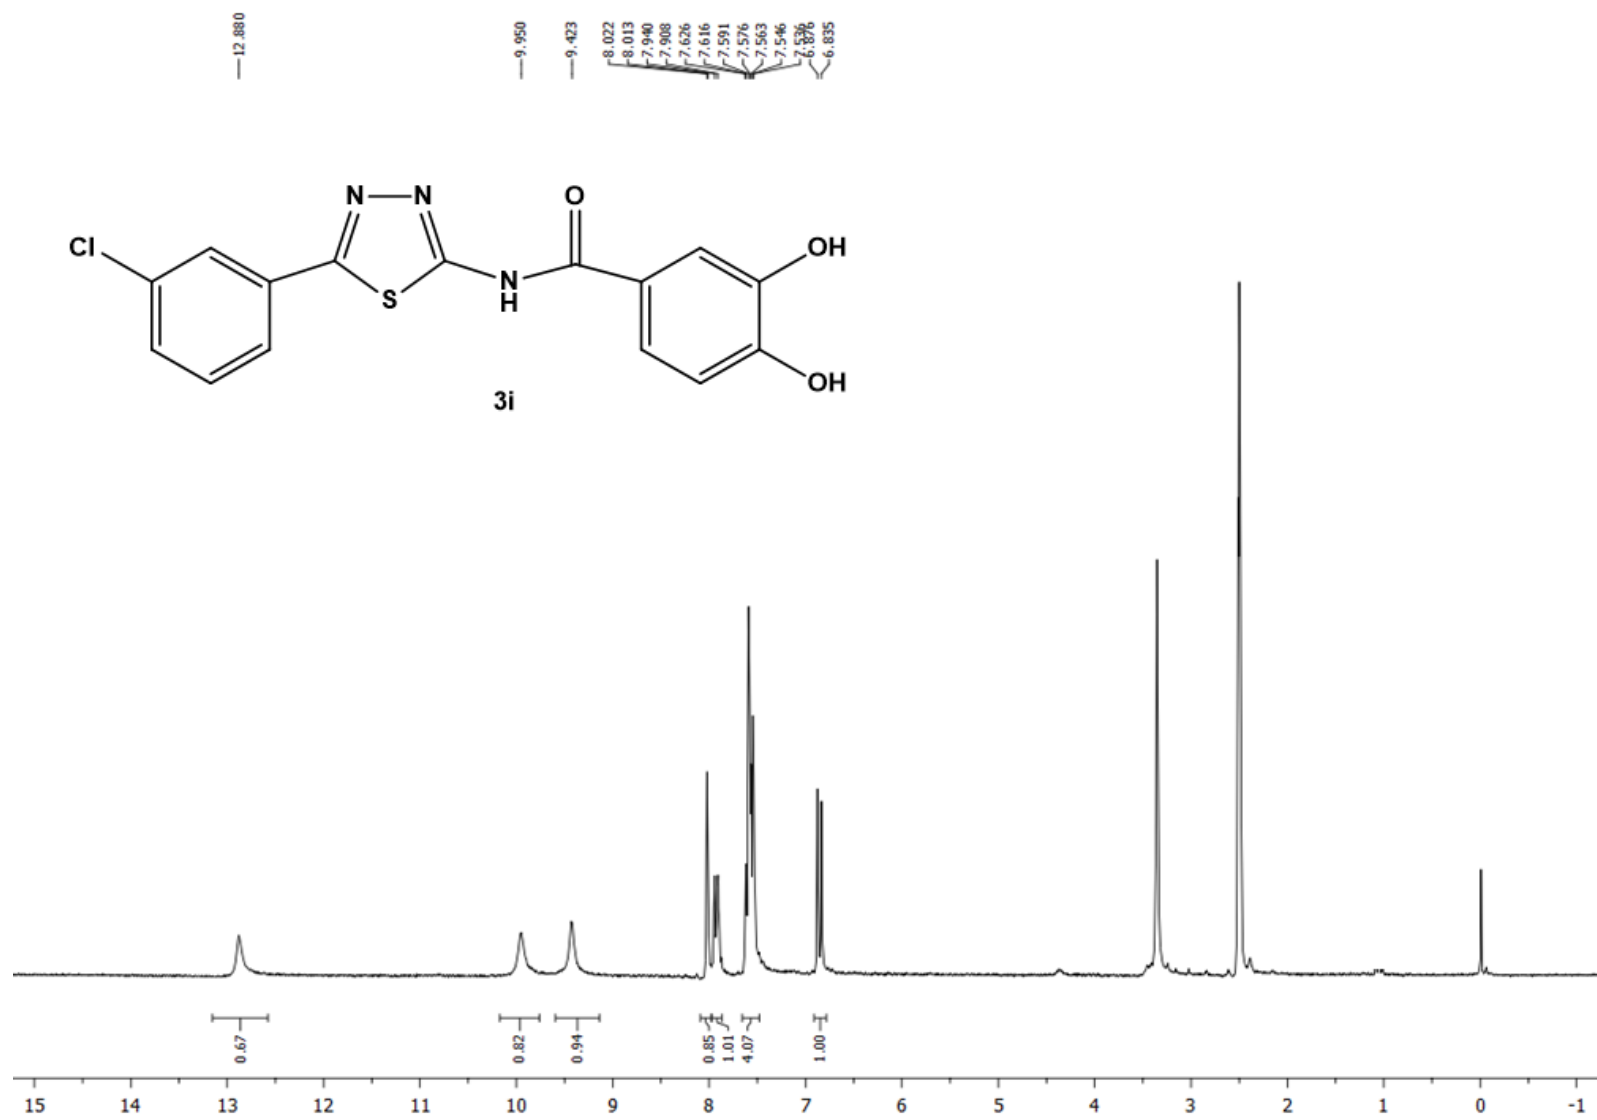

**Figure S17.** <sup>1</sup>H NMR spectrum of **3i** in DMSO-d<sub>6</sub> (200 MHz).

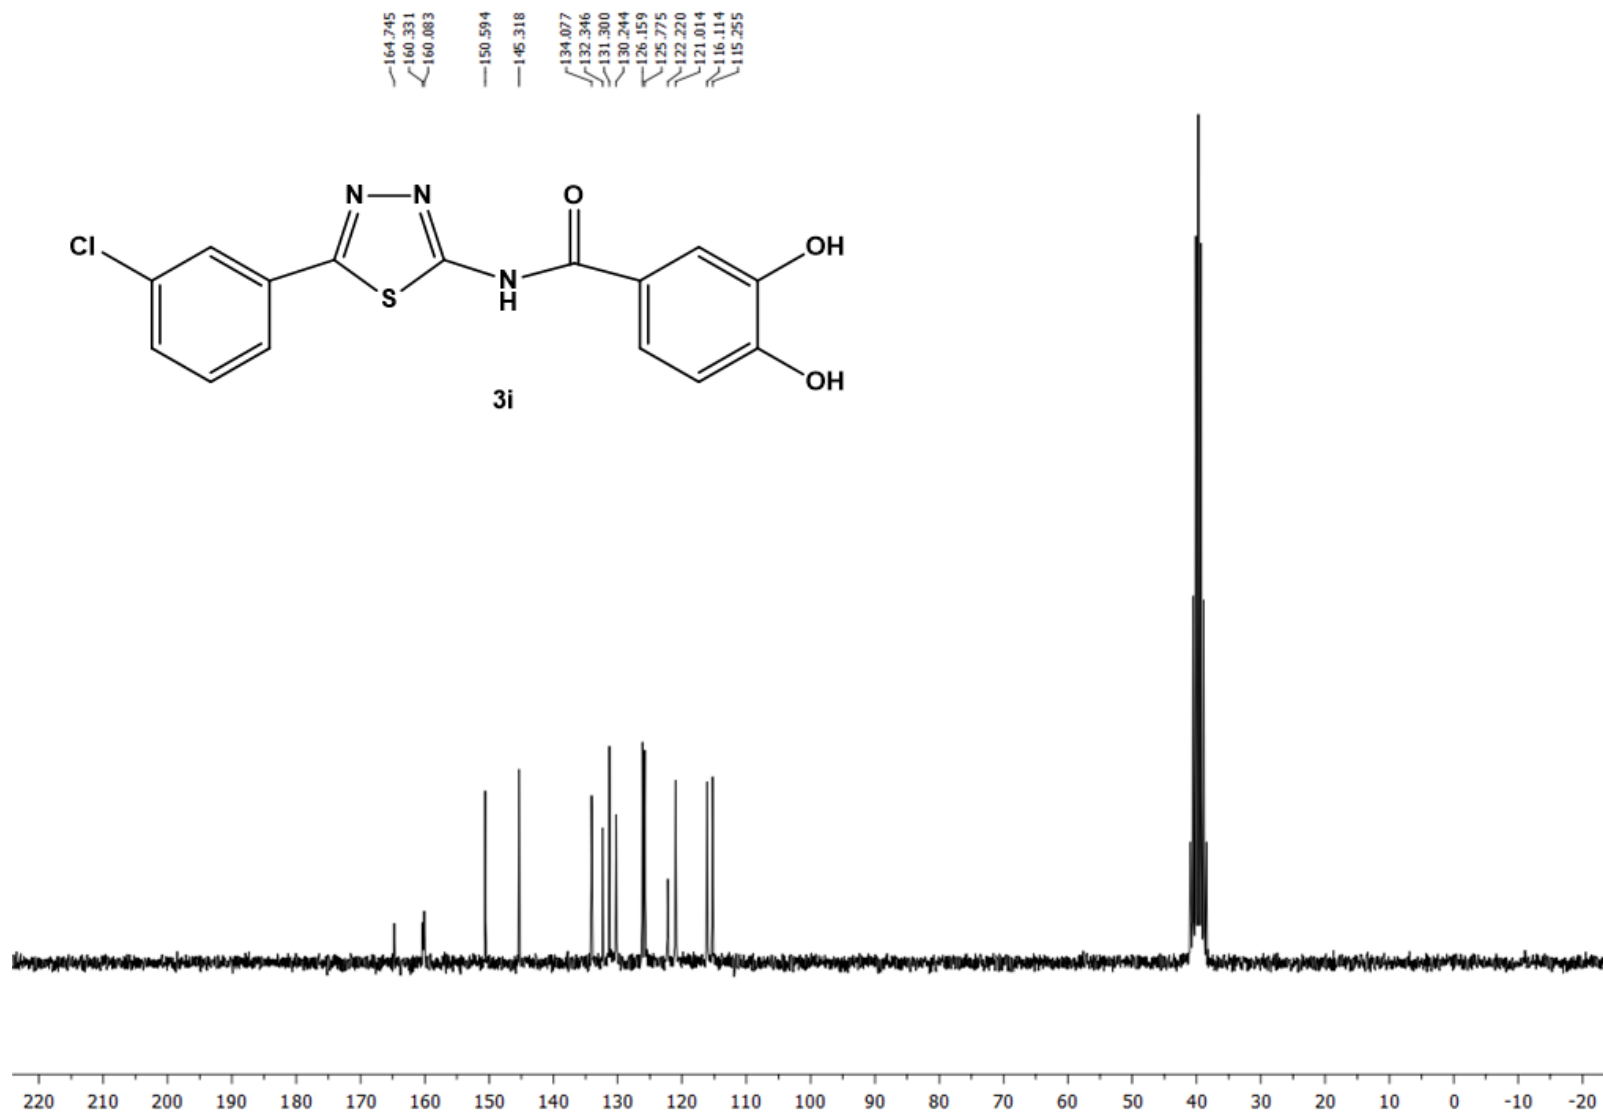

**Figure S18.** <sup>13</sup>C NMR spectrum of **3i** in DMSO-d<sub>6</sub> (50 MHz).

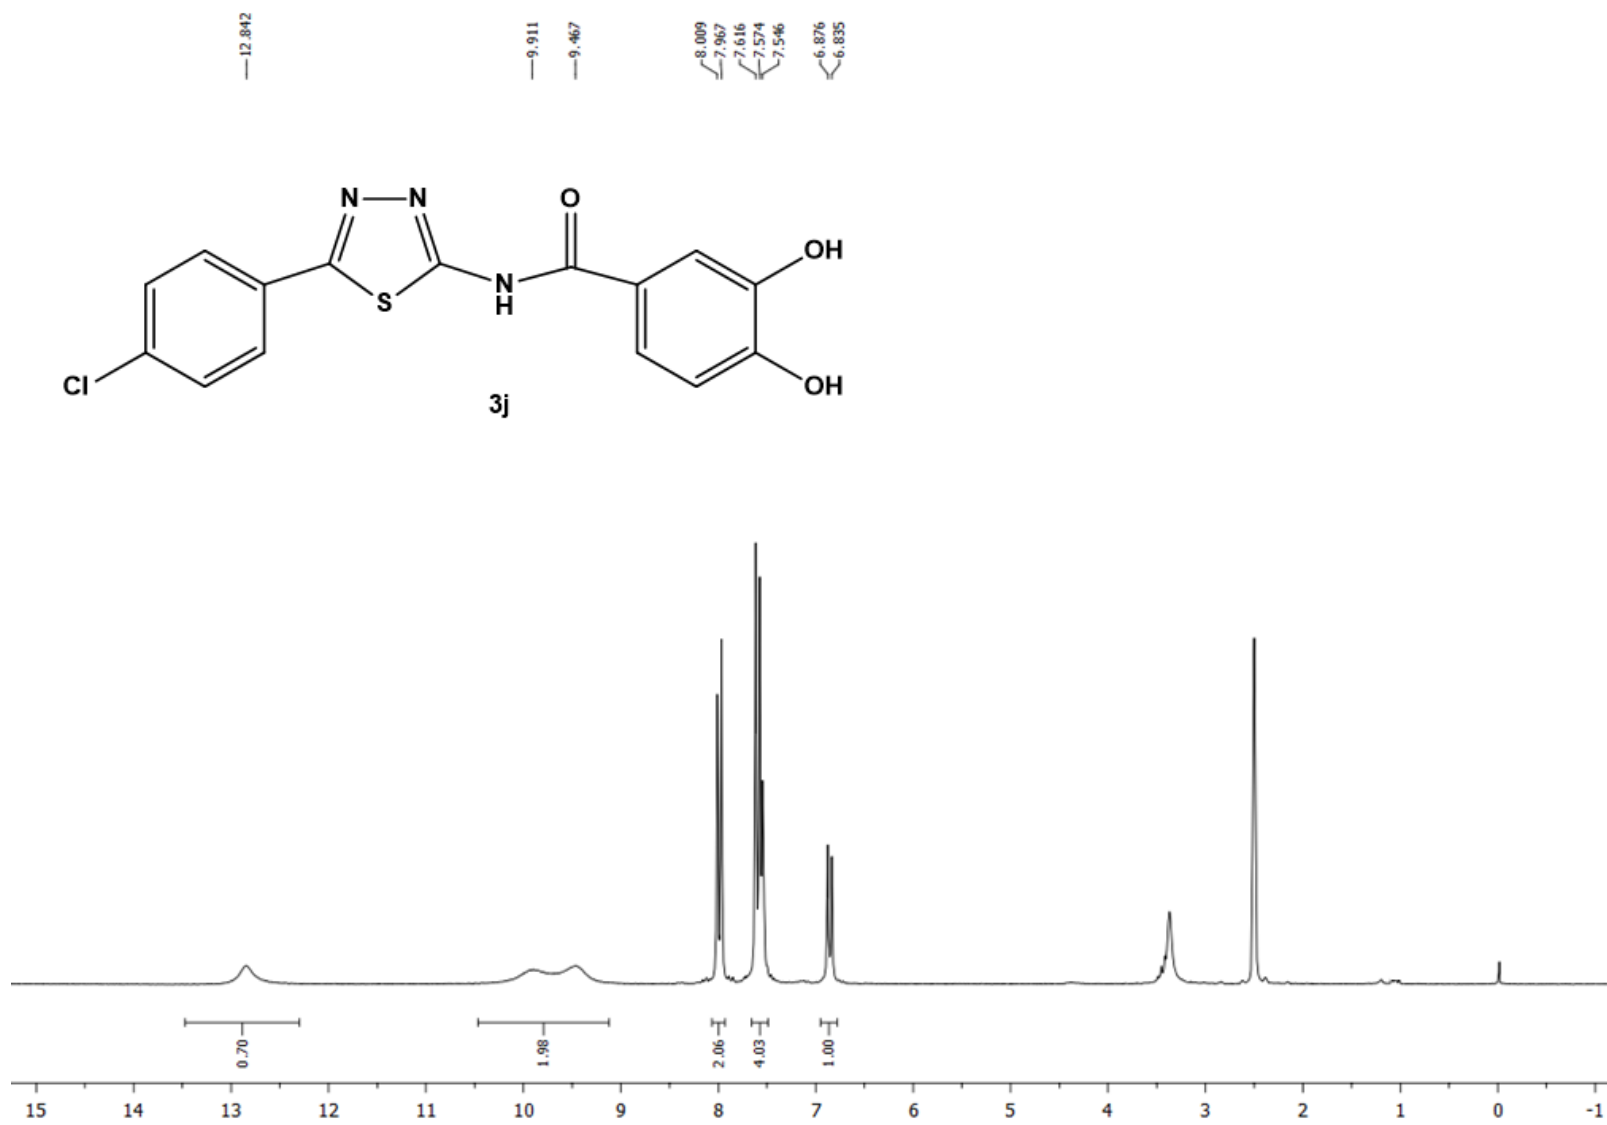

**Figure S19.** <sup>1</sup>H NMR spectrum of **3j** in DMSO-d<sub>6</sub> (200 MHz).

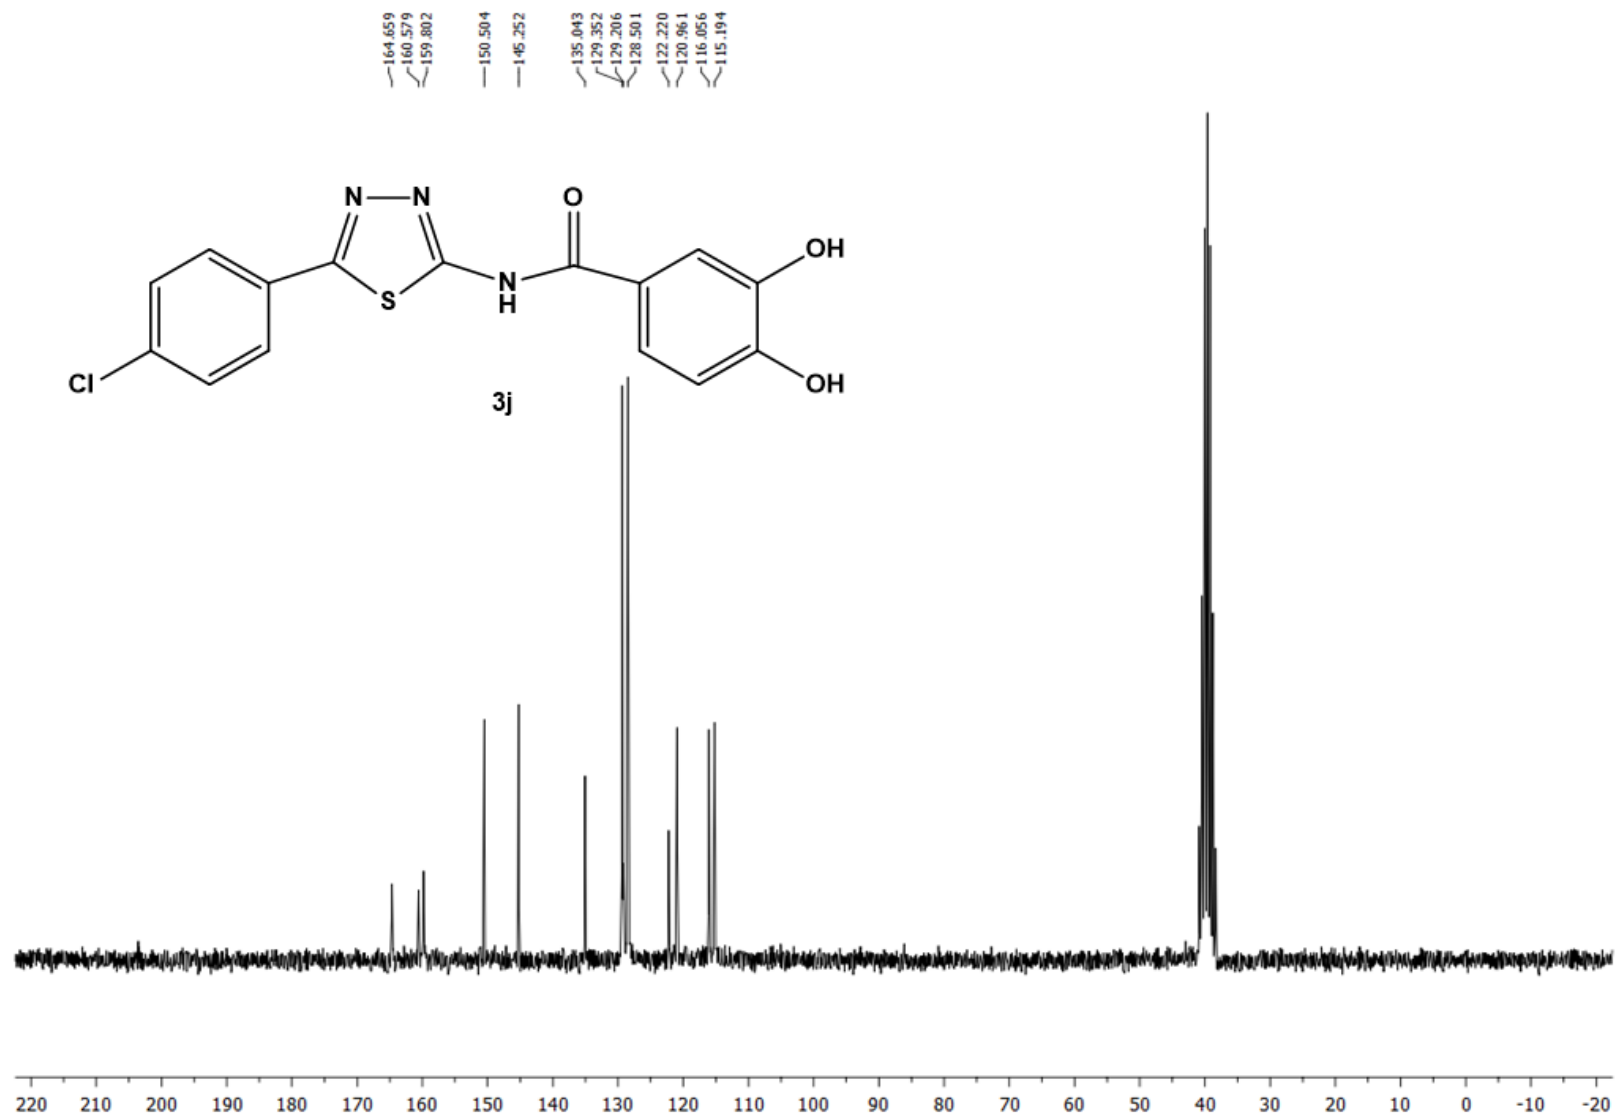

**Figure S20.** <sup>13</sup>C NMR spectrum of **3j** in DMSO-d<sub>6</sub> (50 MHz).

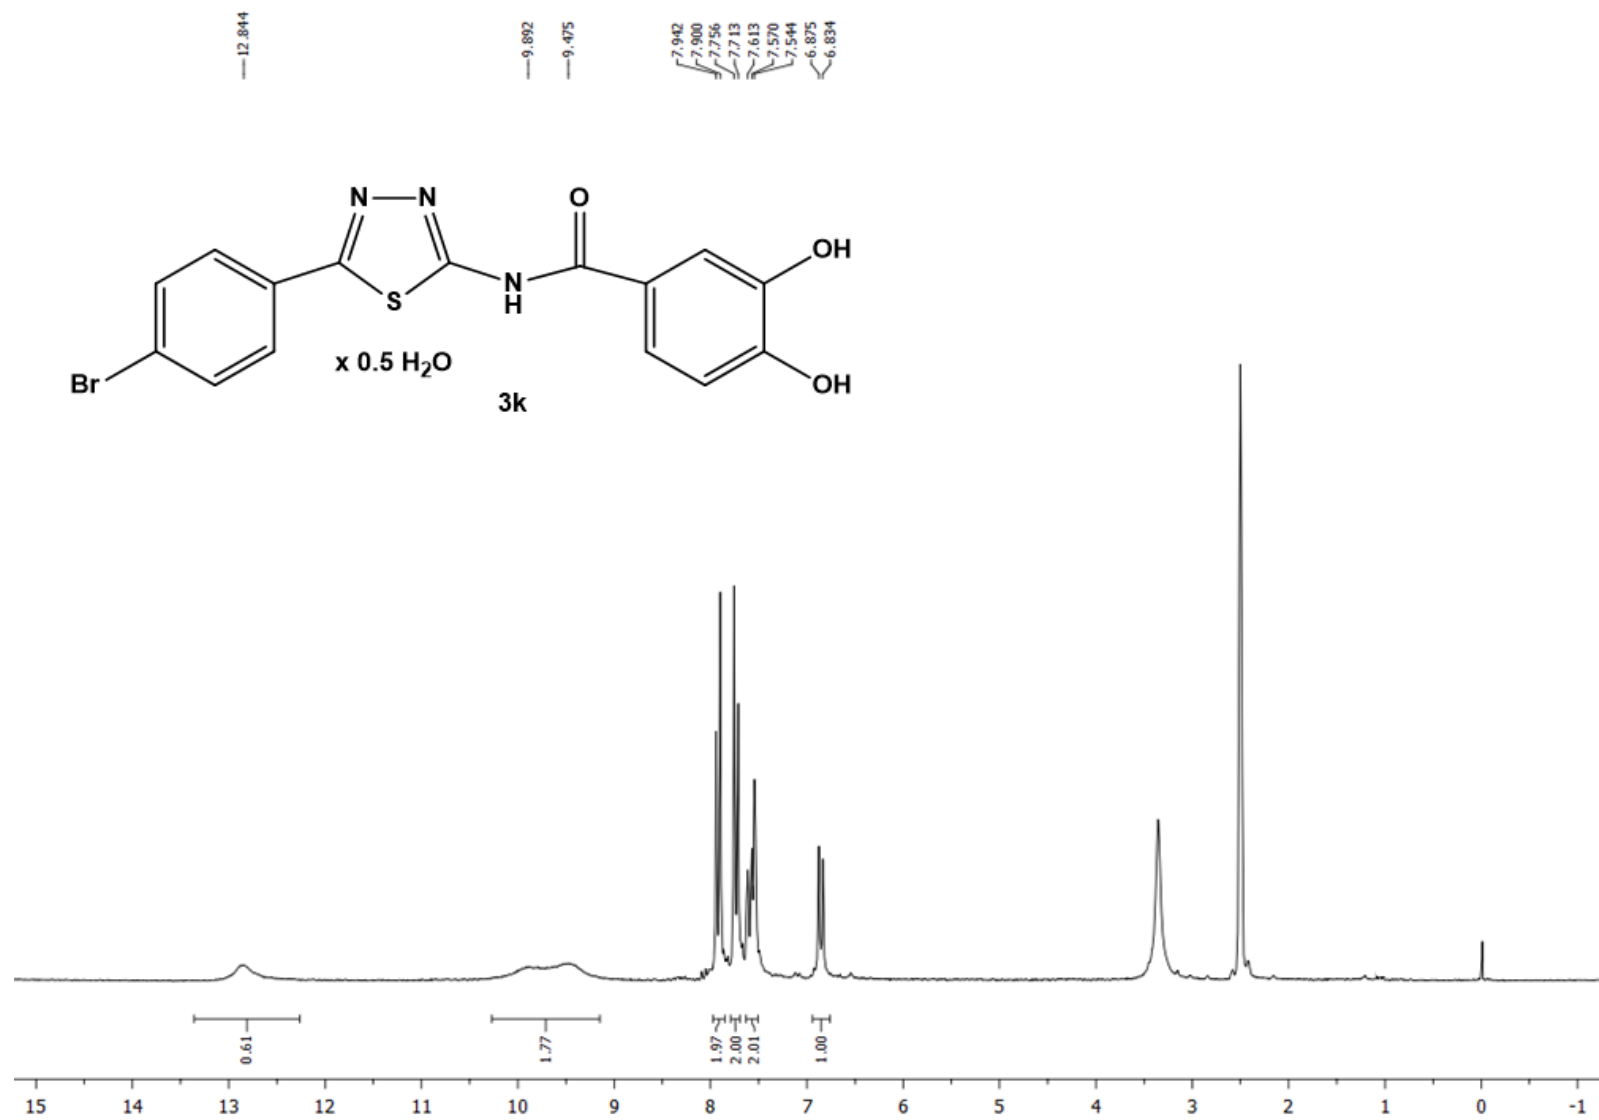

Figure S21. <sup>1</sup>H NMR spectrum of **3k** in DMSO-d<sub>6</sub> (200 MHz).

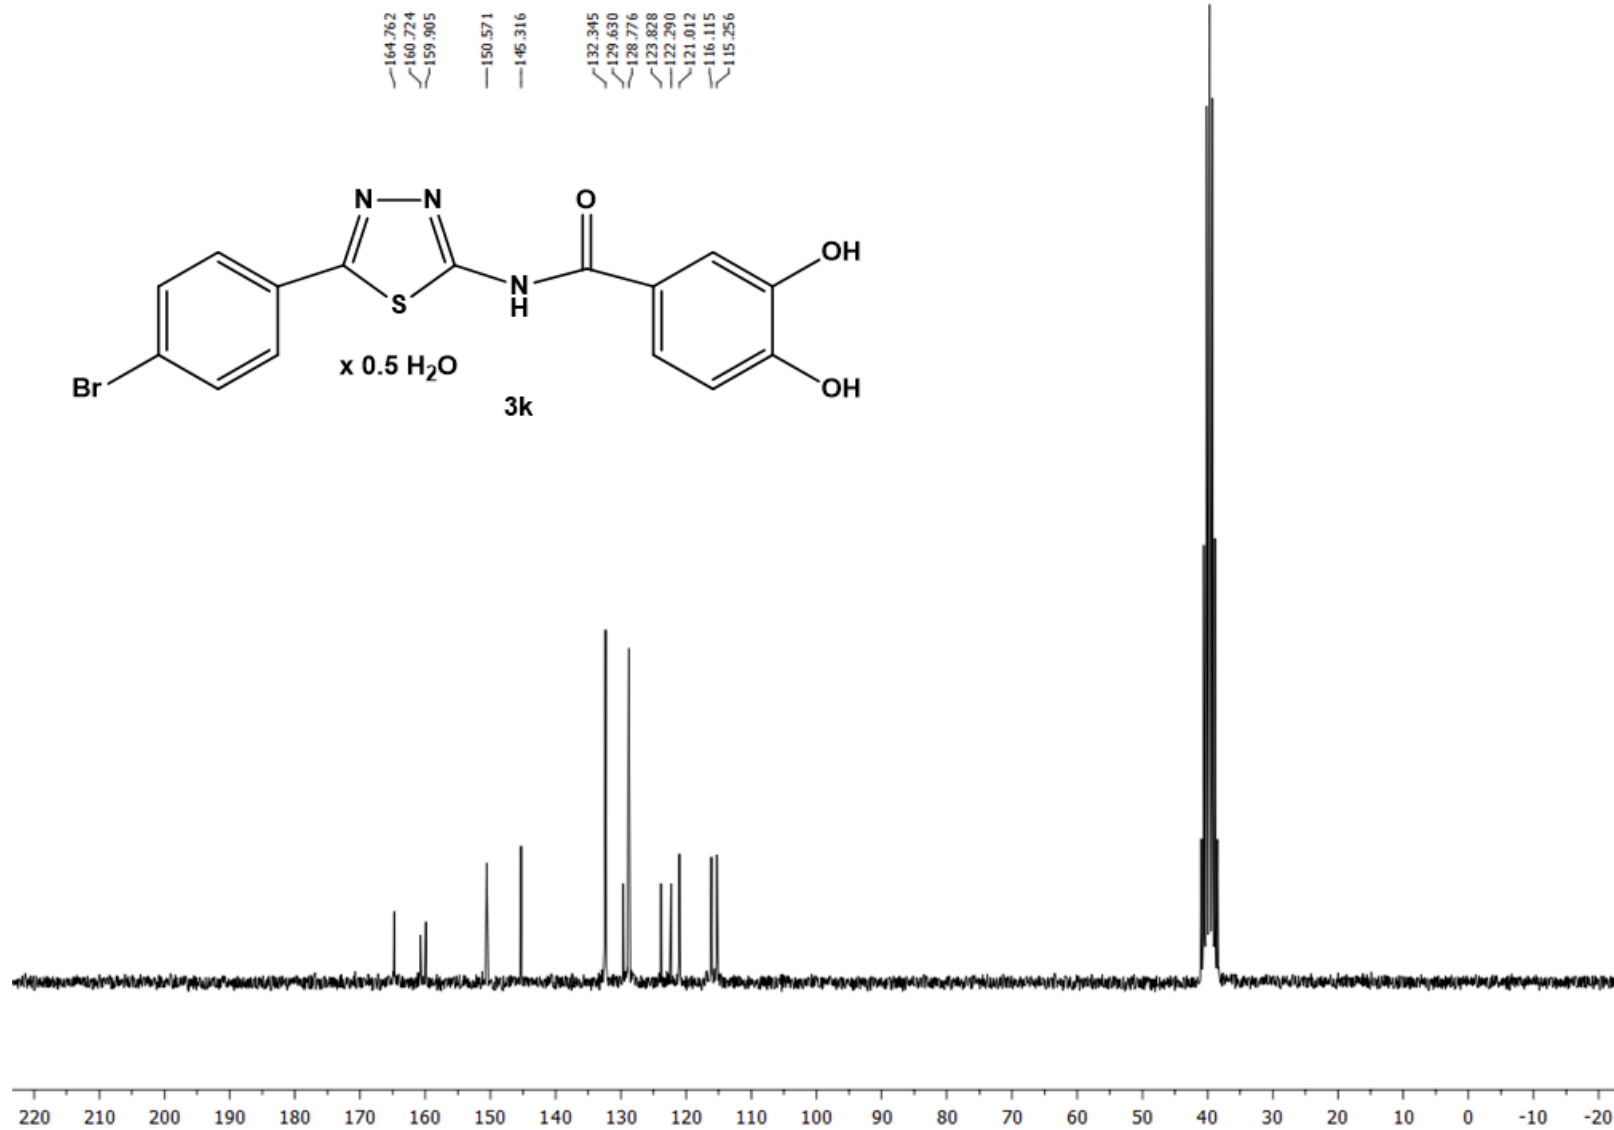

**Figure S22.** <sup>13</sup>C NMR spectrum of **3k** in DMSO-d<sub>6</sub> (50 MHz).



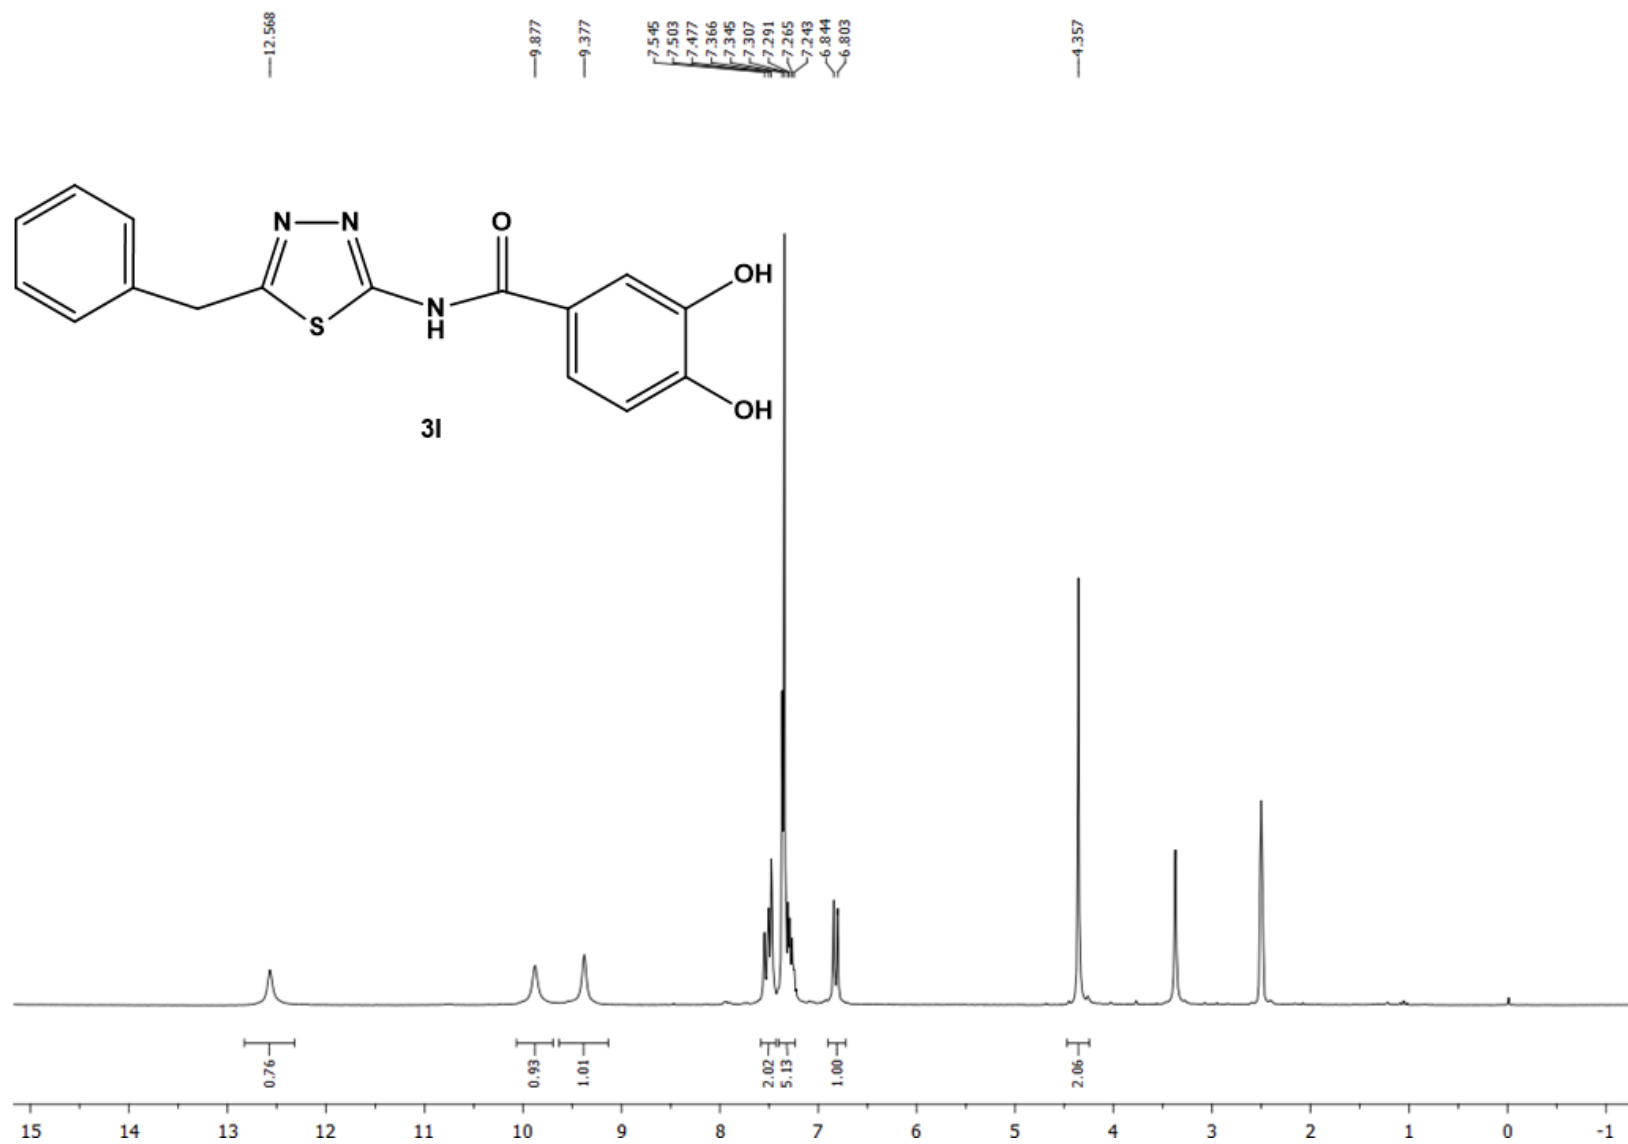

**Figure S23.** <sup>1</sup>H NMR spectrum of **3l** in DMSO-d<sub>6</sub> (200 MHz).

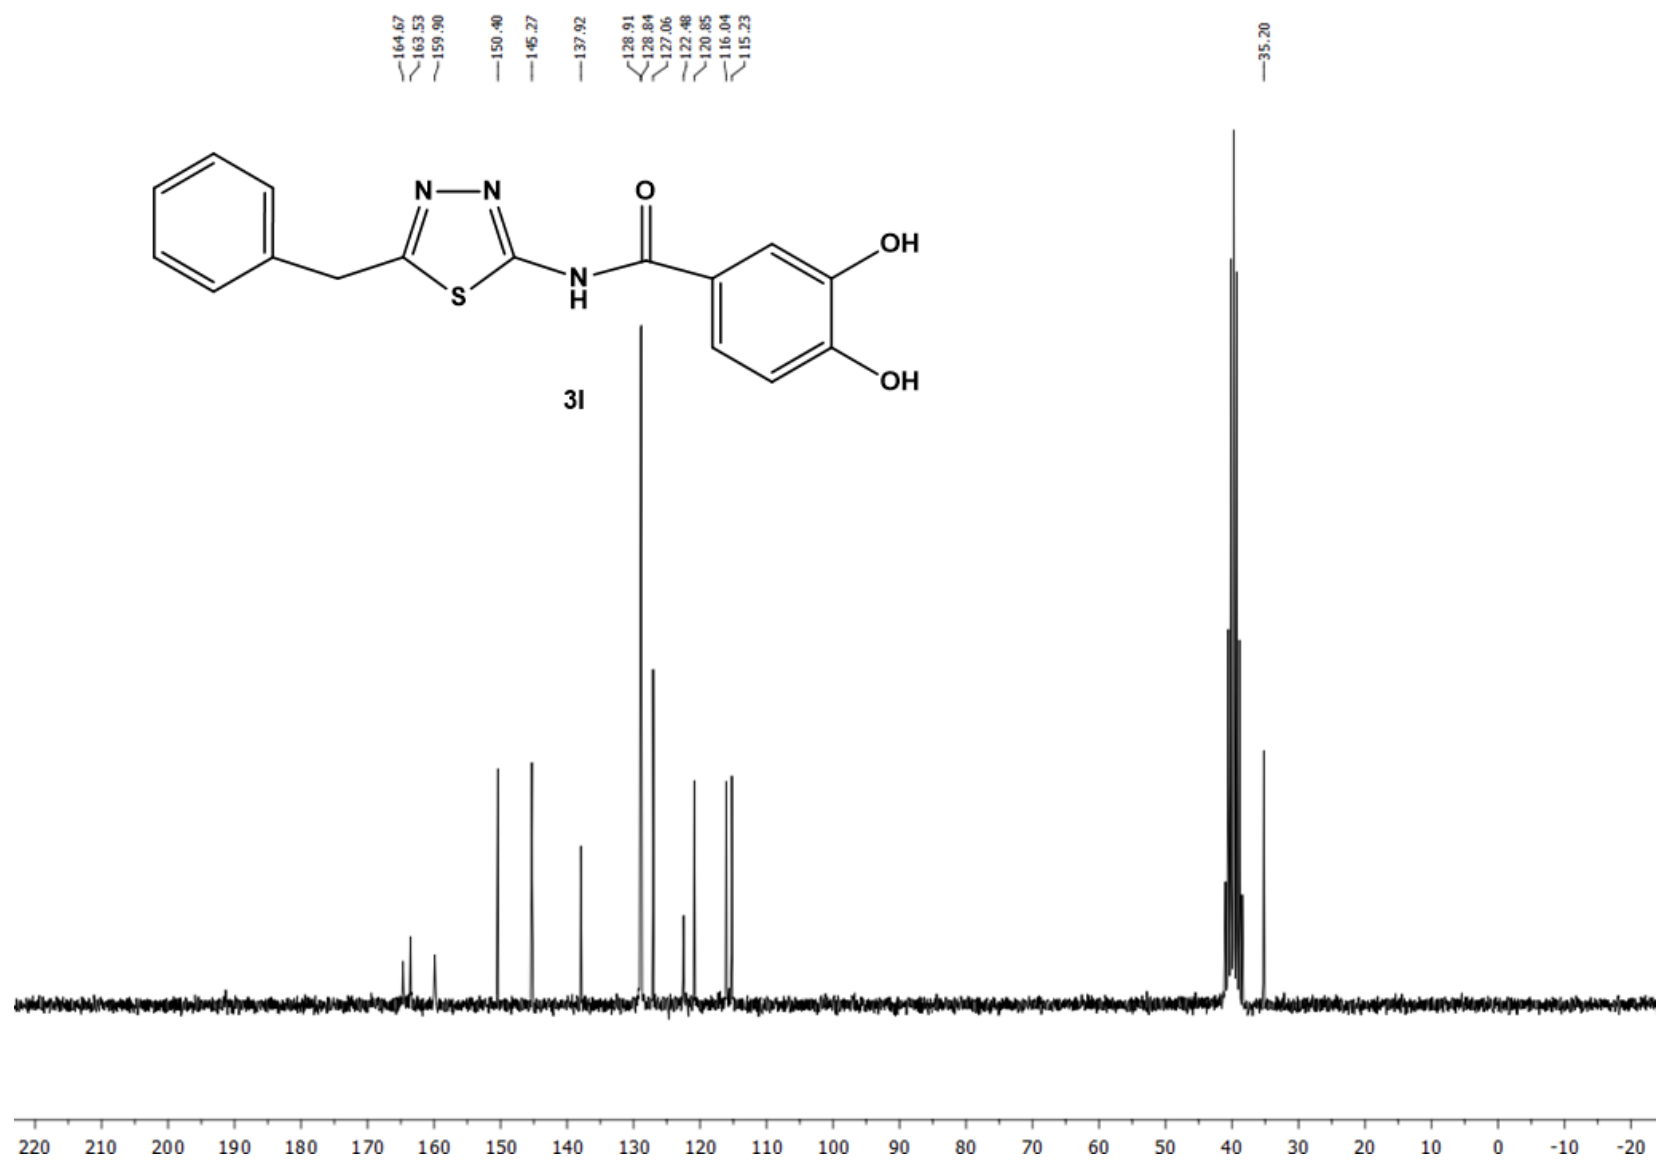

**Figure S24.**  $^{13}\text{C}$  NMR spectrum of **3I** in  $\text{DMSO-d}_6$  (50 MHz).

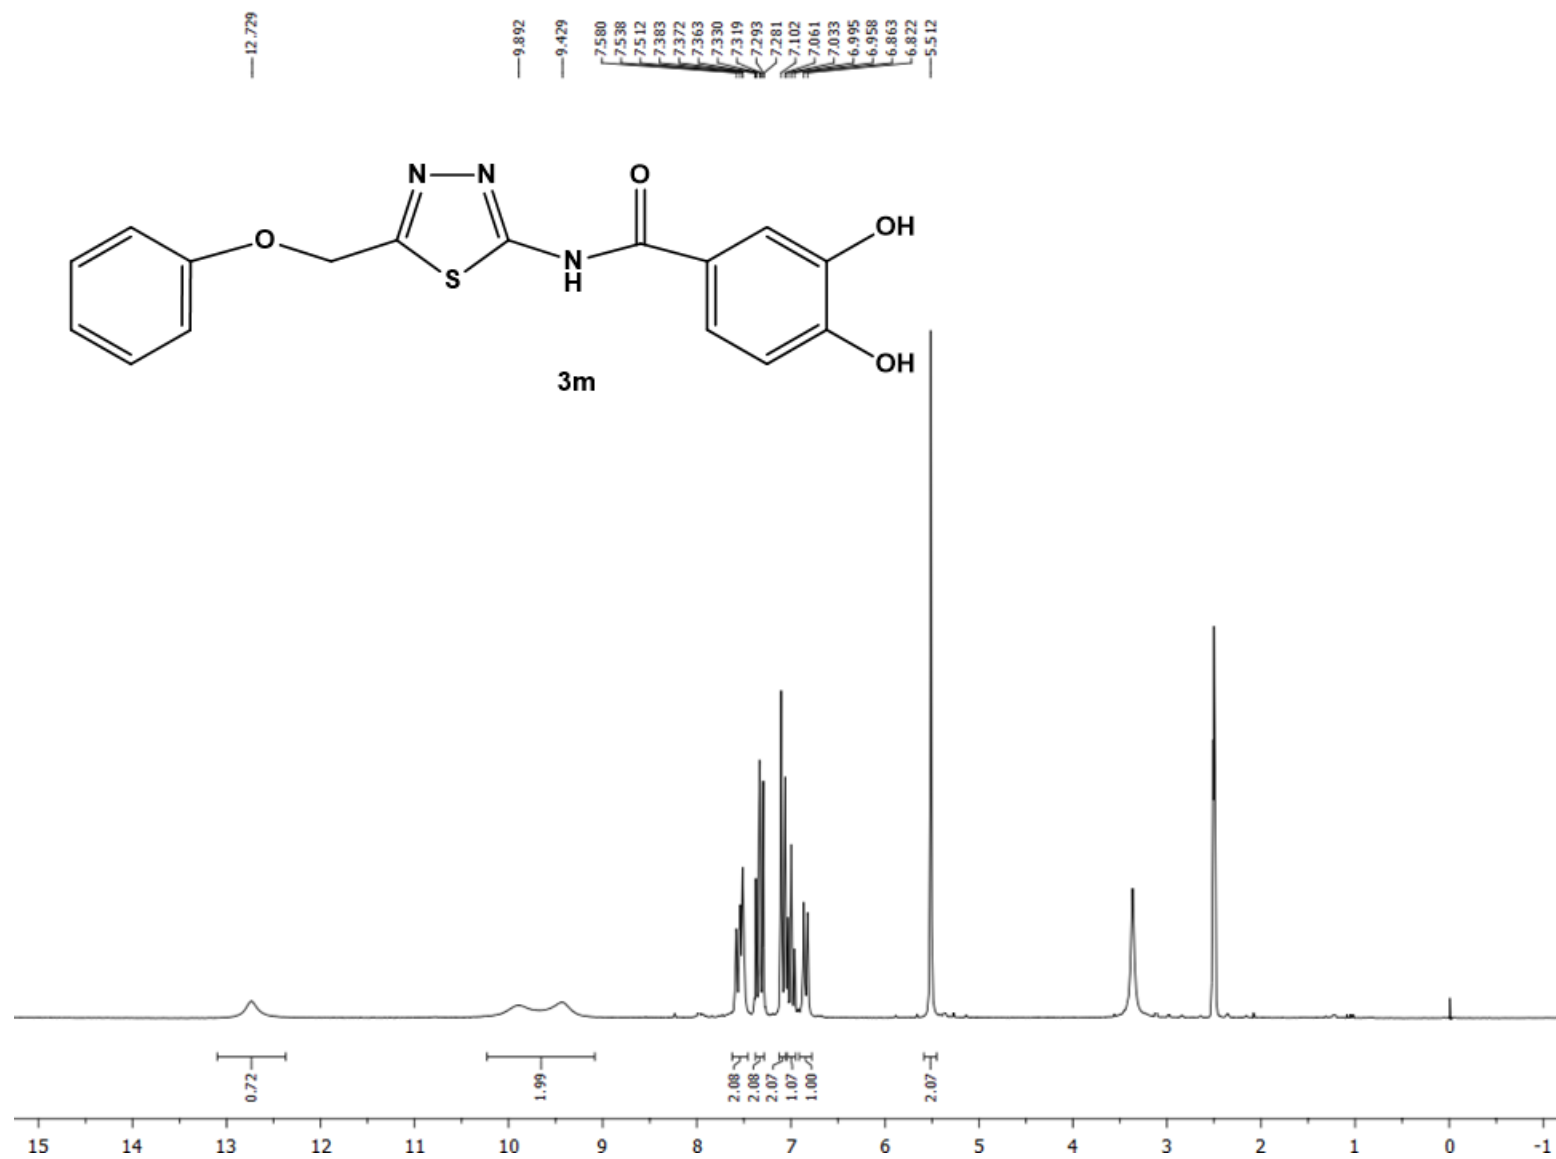

**Figure S25.** <sup>1</sup>H NMR spectrum of **3m** in DMSO-d<sub>6</sub> (200 MHz).

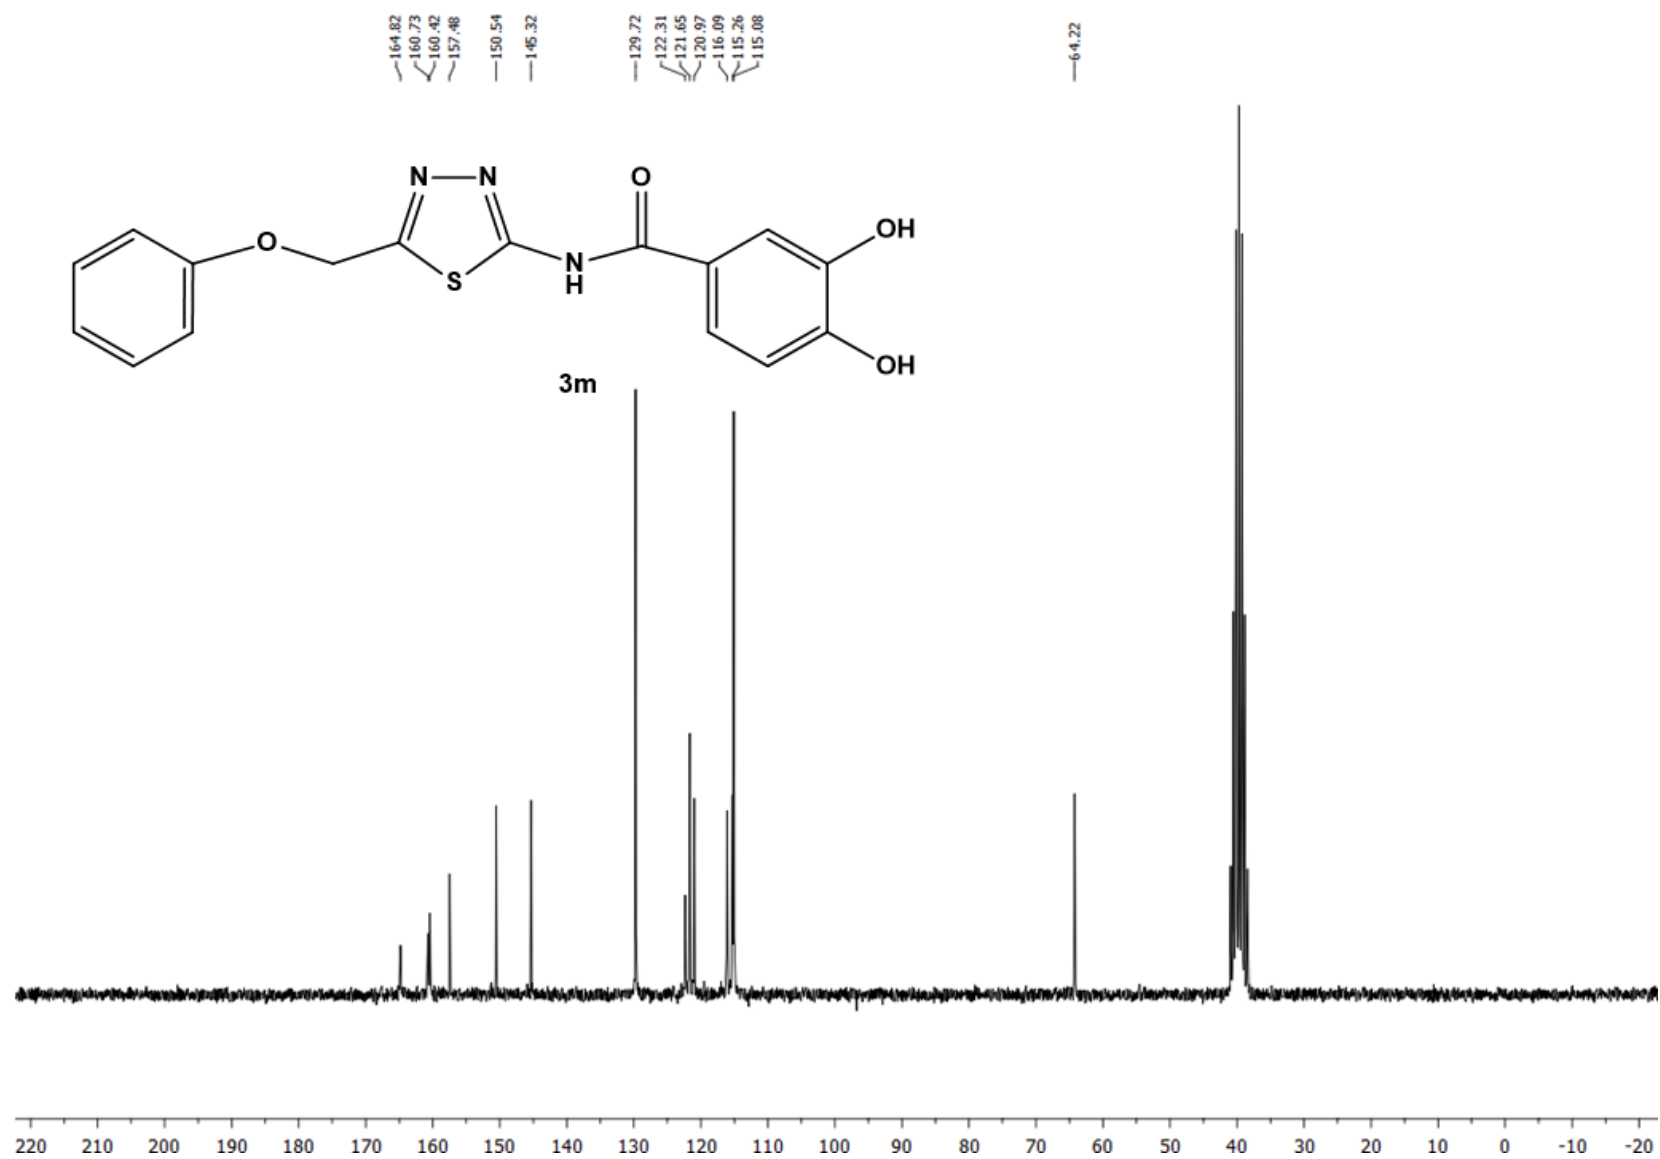

**Figure S26.**  $^{13}\text{C}$  NMR spectrum of **3m** in DMSO- $d_6$  (50 MHz).

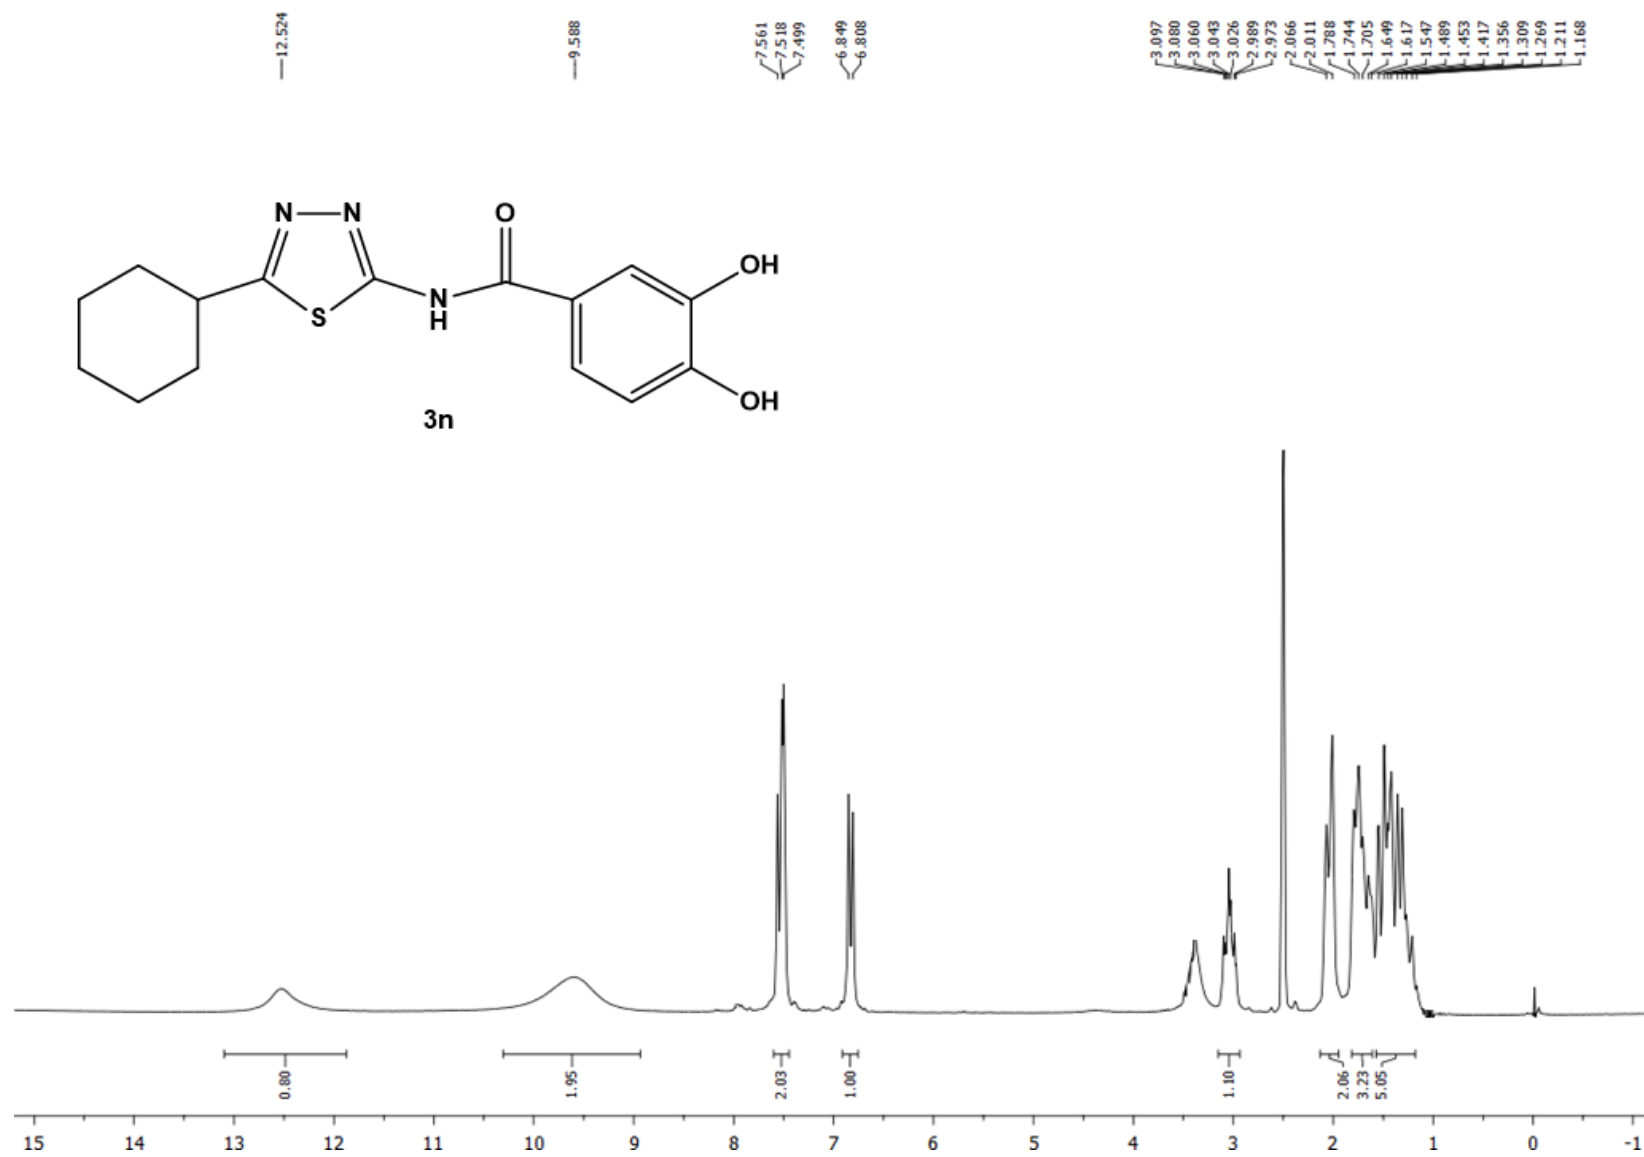

**Figure S27.** <sup>1</sup>H NMR spectrum of **3n** in DMSO-d<sub>6</sub> (200 MHz).

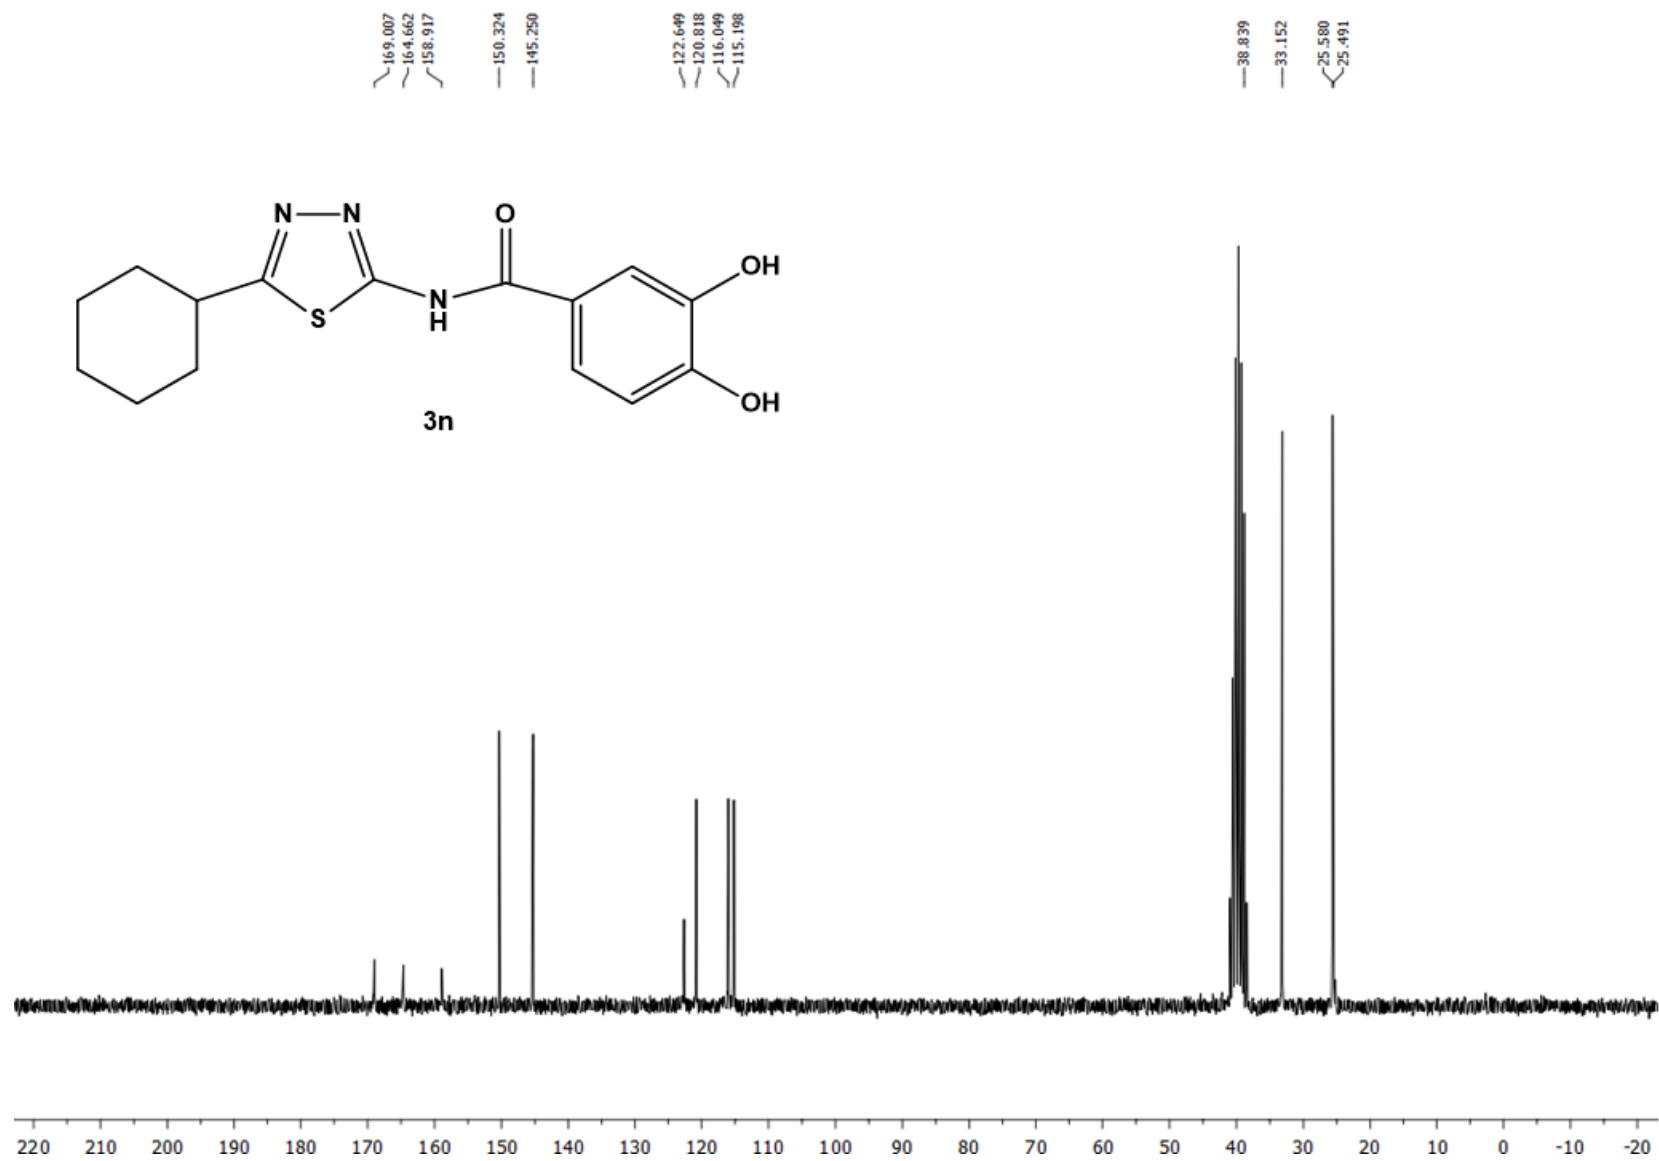

**Figure S28.** <sup>13</sup>C NMR spectrum of **3n** in DMSO-d<sub>6</sub> (50 MHz).

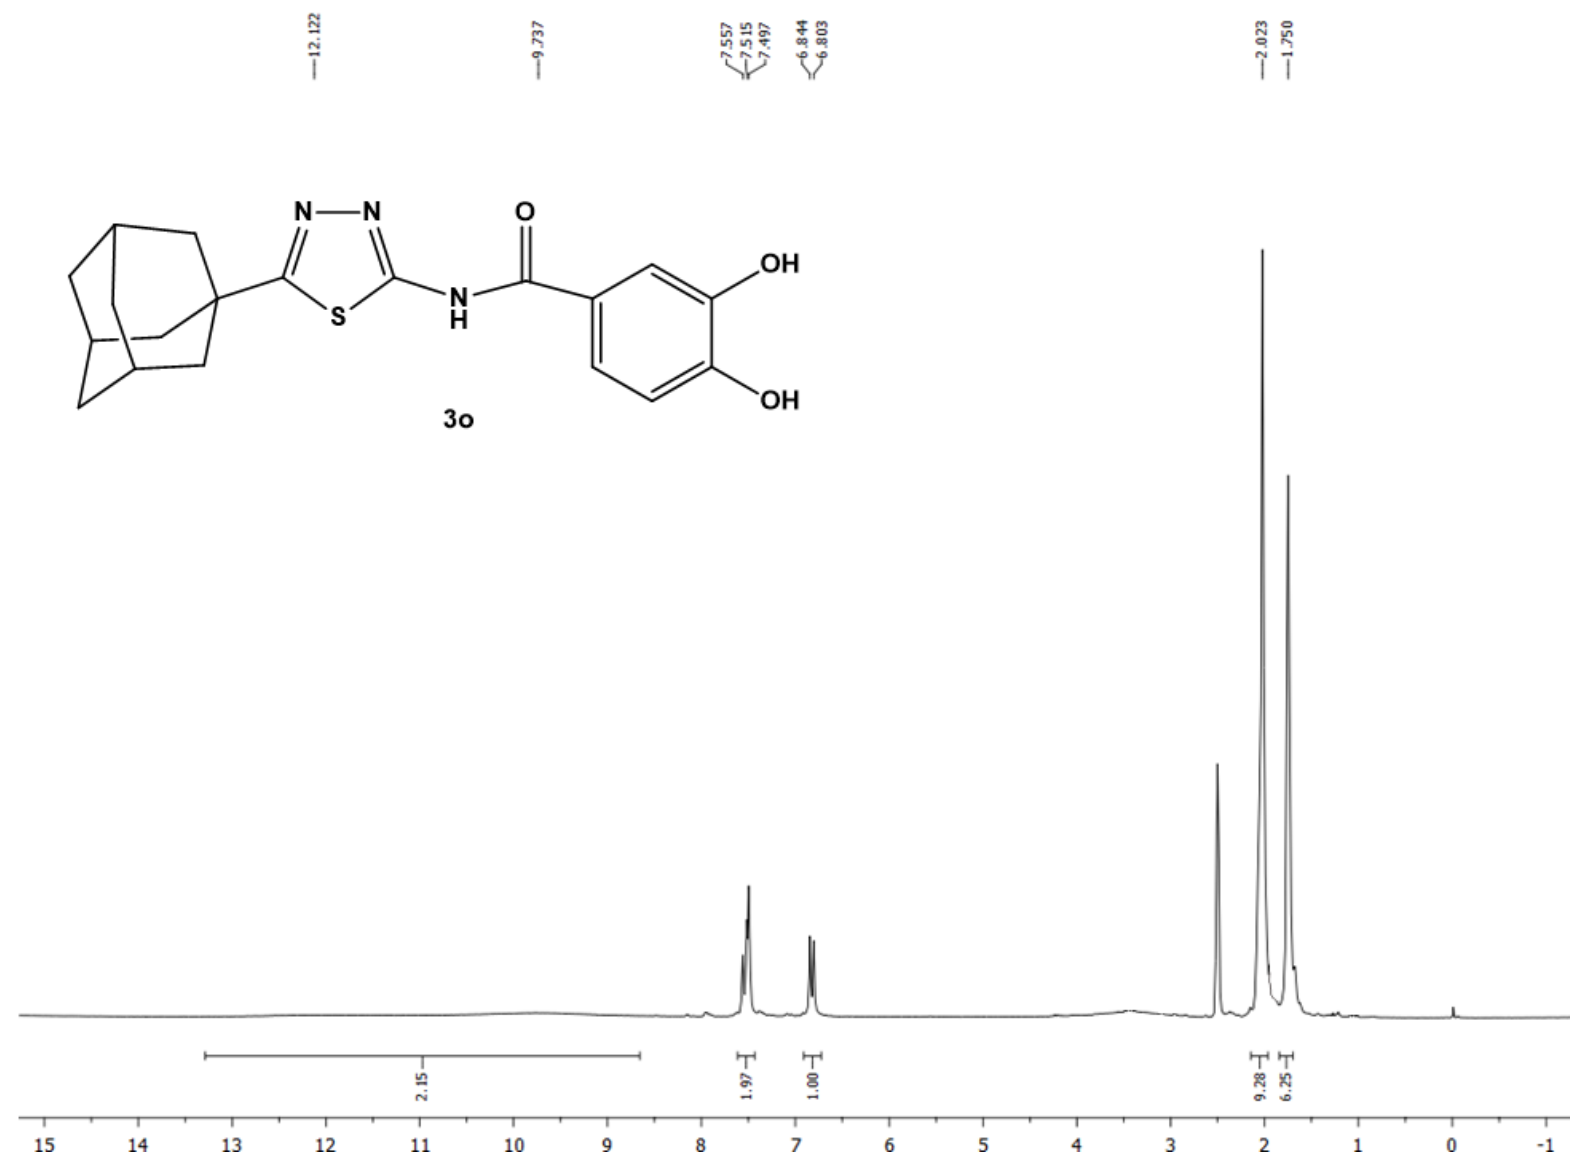

**Figure S29.**  $^1\text{H}$  NMR spectrum of **3o** in  $\text{DMSO-d}_6$  (200 MHz).

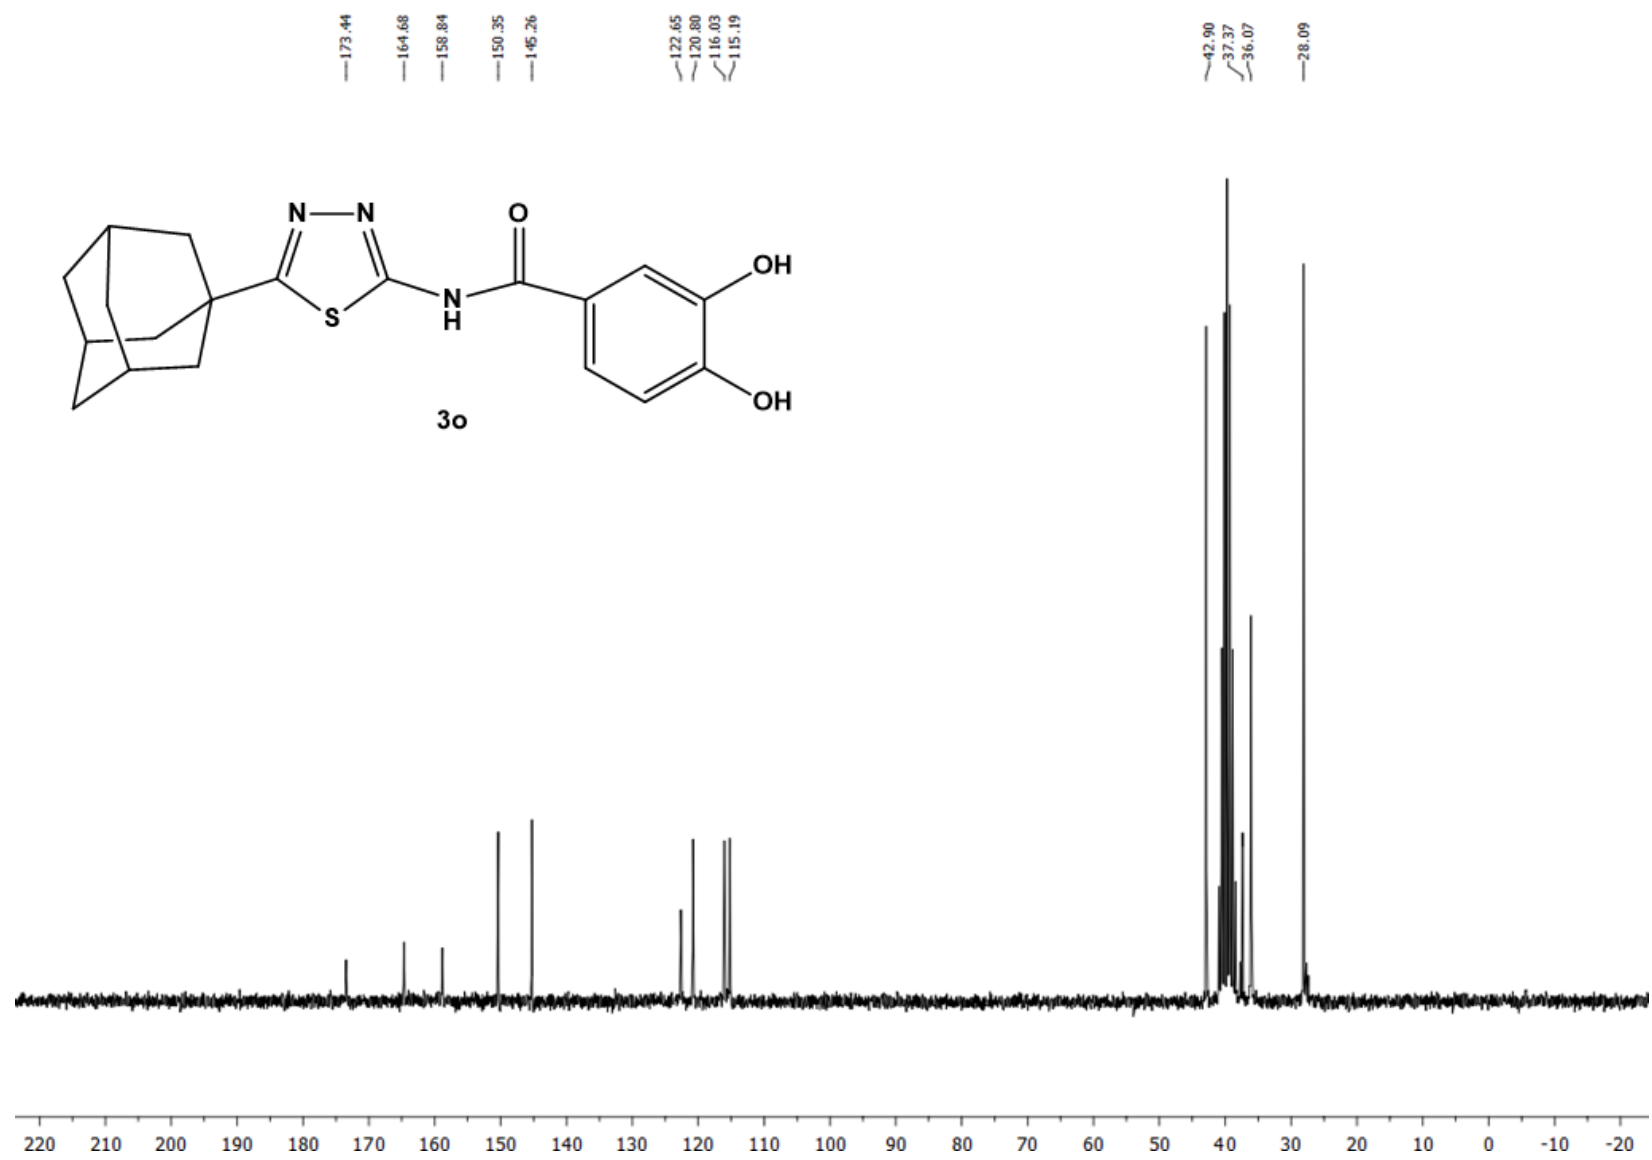

Figure S30. <sup>13</sup>C NMR spectrum of **3o** in DMSO-d<sub>6</sub> (50 MHz).



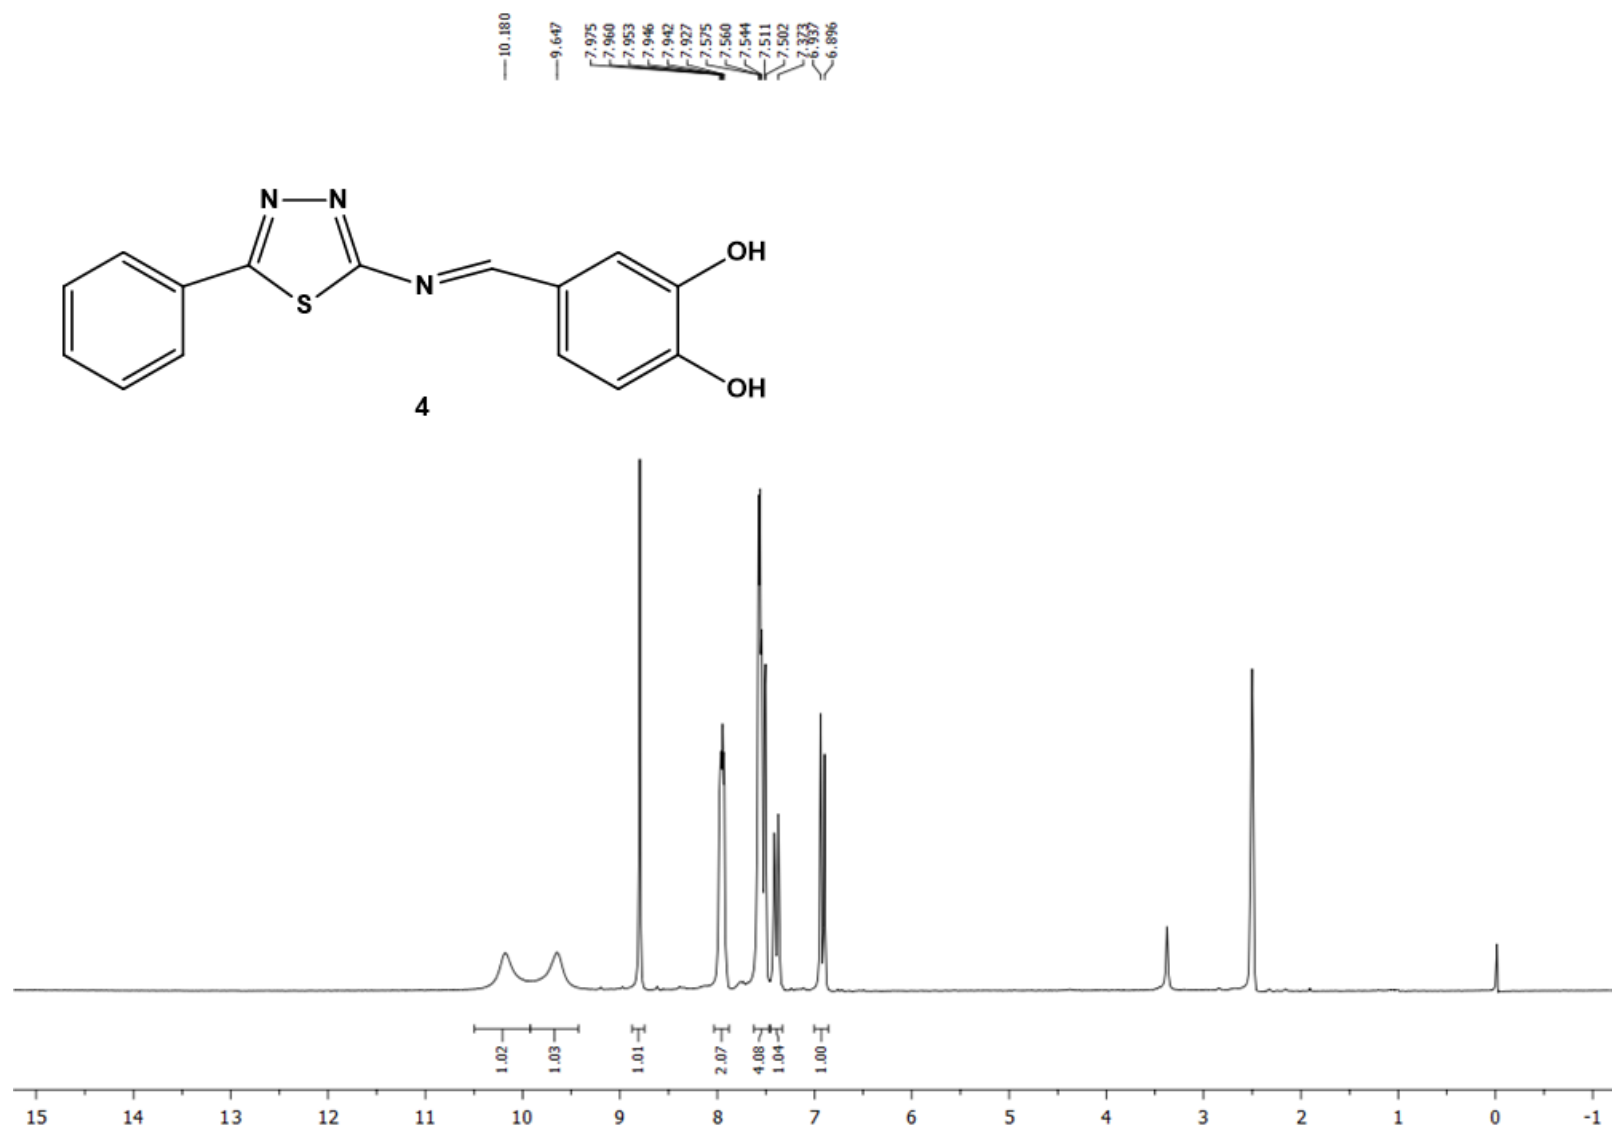

**Figure S31.** <sup>1</sup>H NMR spectrum of **4** in DMSO-d<sub>6</sub> (200 MHz).

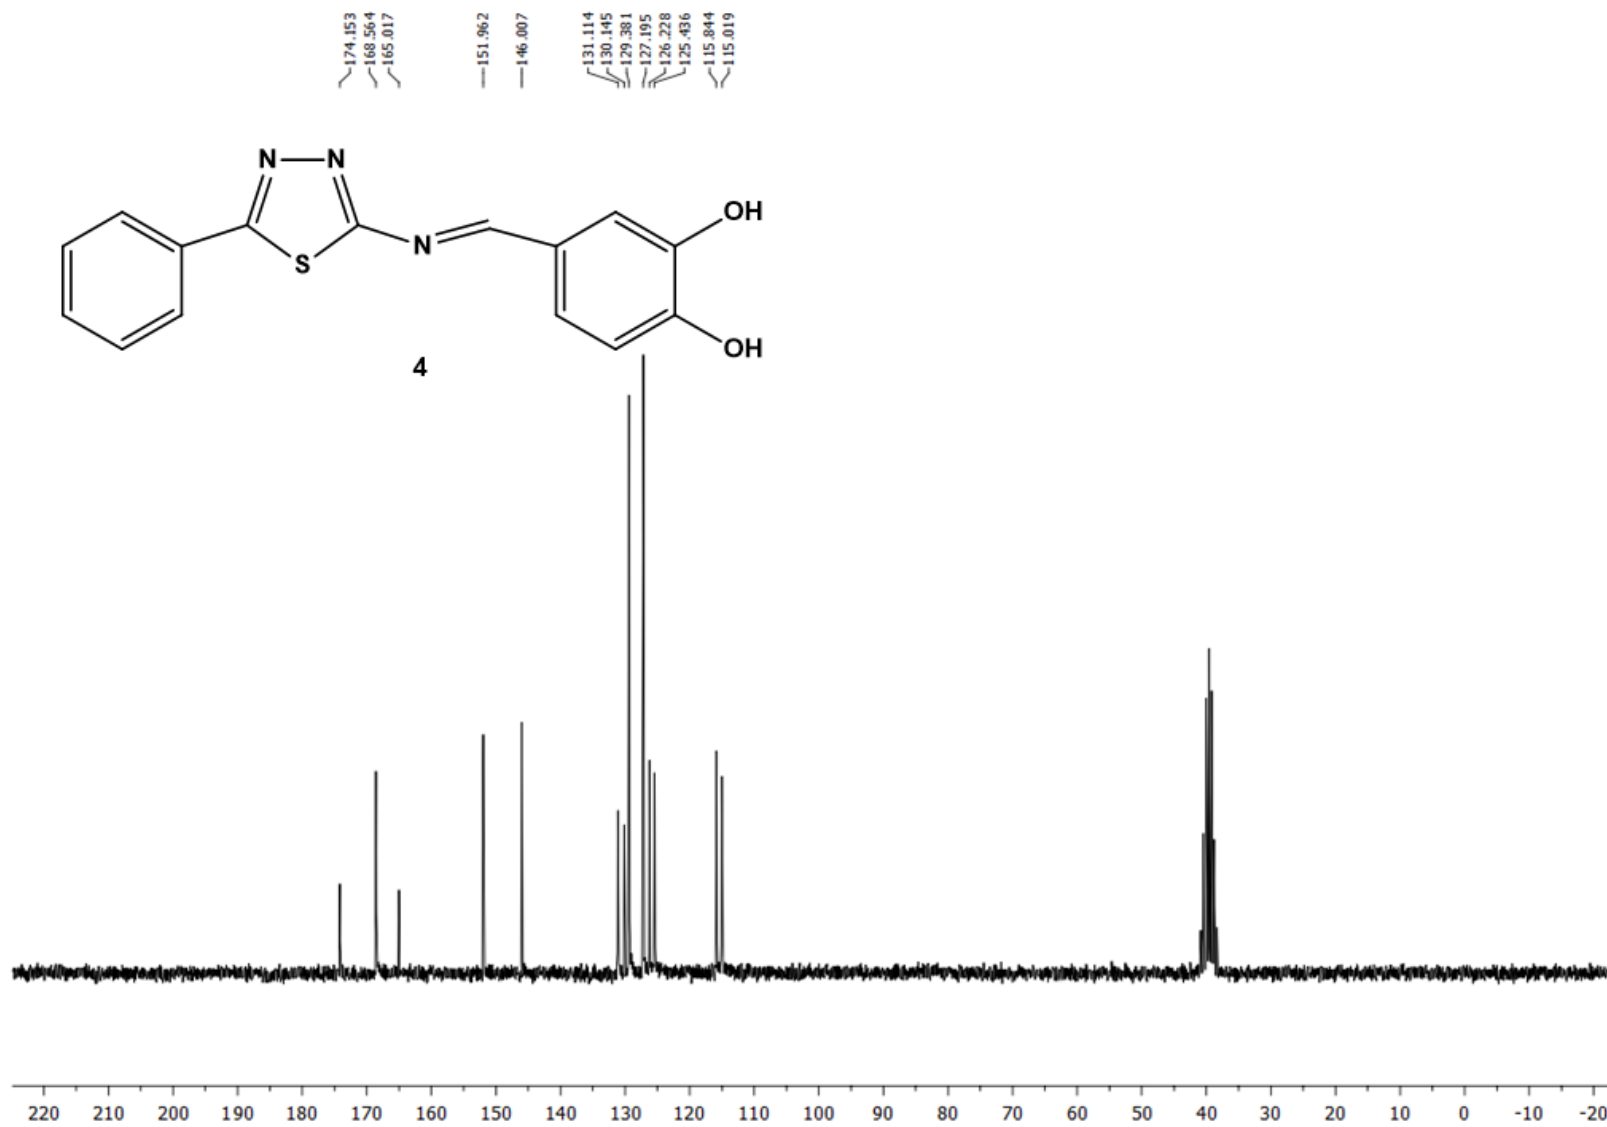

**Figure S32.** <sup>13</sup>C NMR spectrum of **4** in DMSO-d<sub>6</sub> (50 MHz).

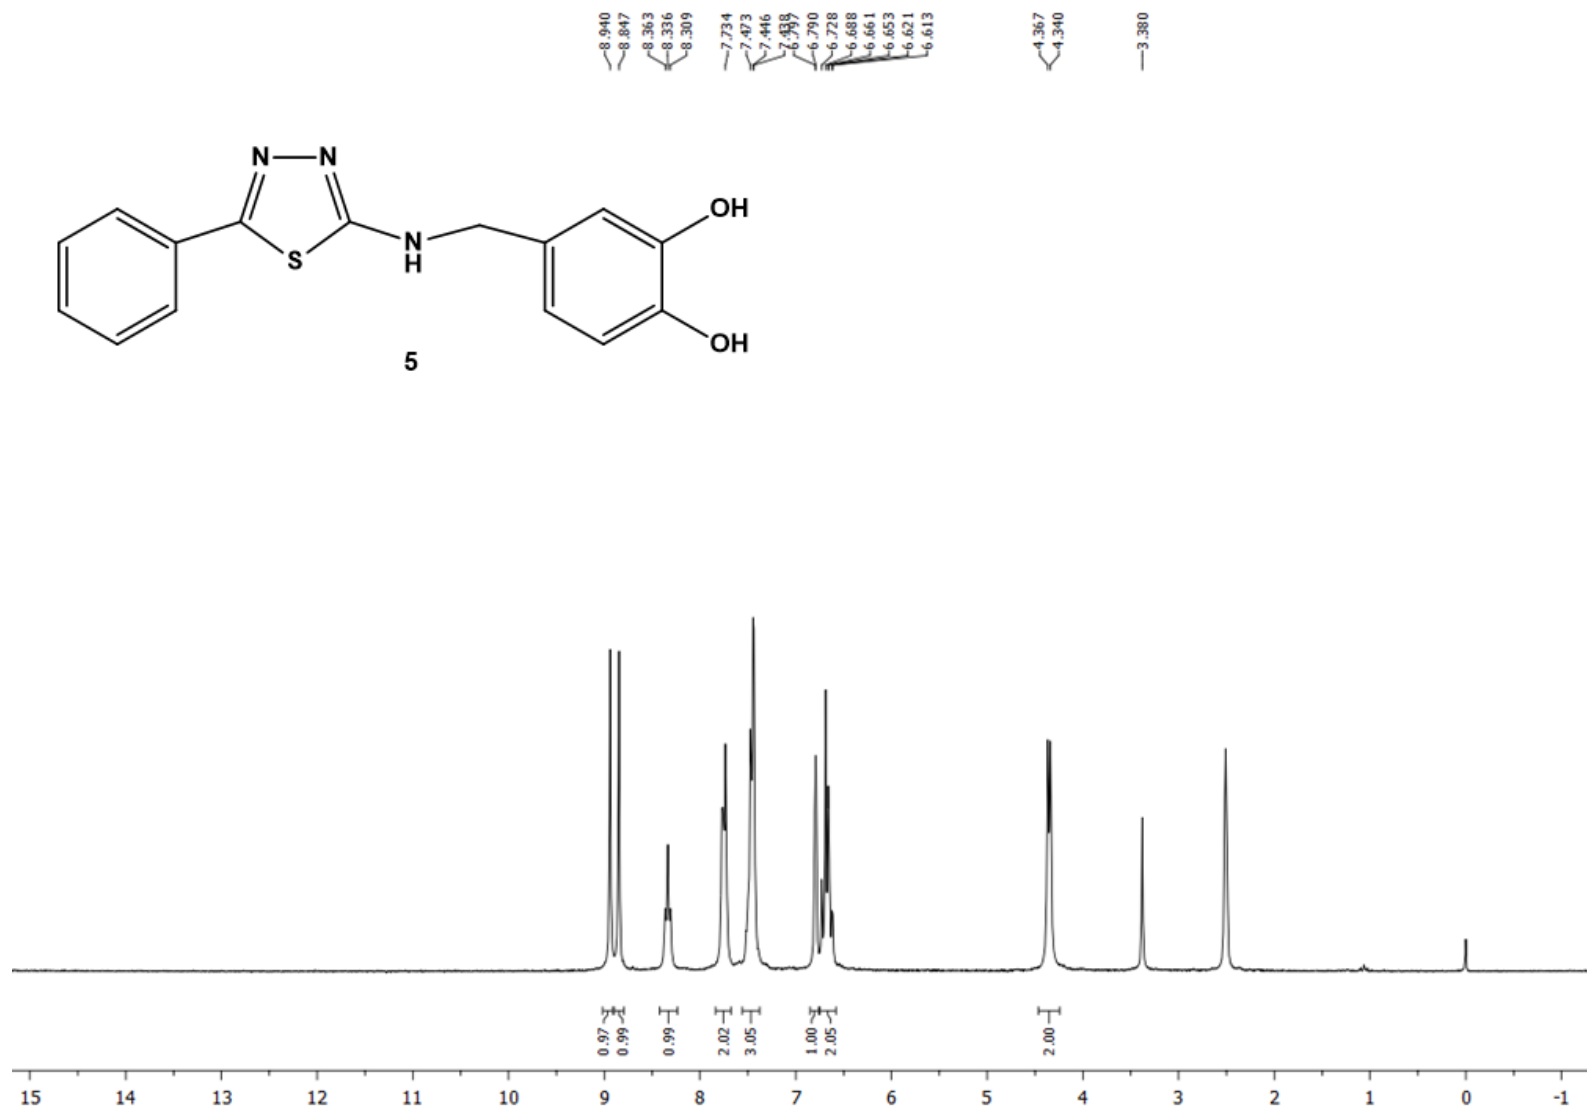

**Figure S33.** <sup>1</sup>H NMR spectrum of **5** in DMSO-d<sub>6</sub> (200 MHz).

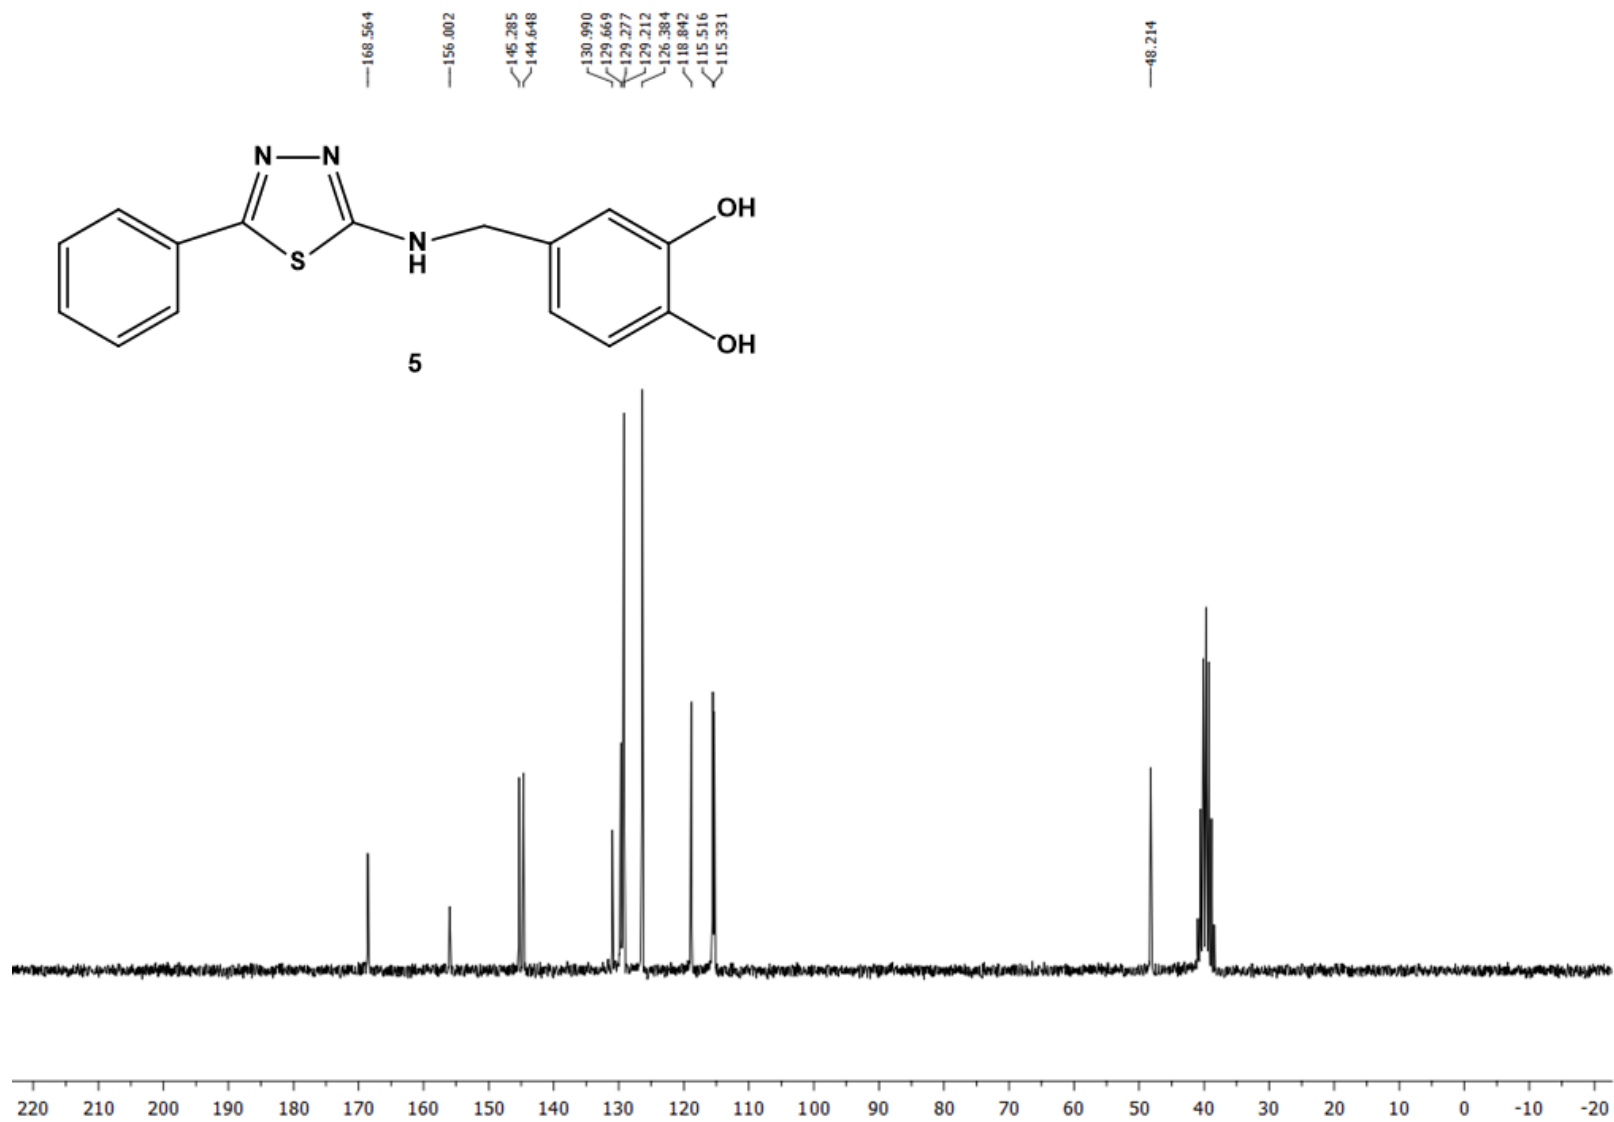

**Figure S34.**  $^{13}\text{C}$  NMR spectrum of **5** in  $\text{DMSO-d}_6$  (50 MHz).

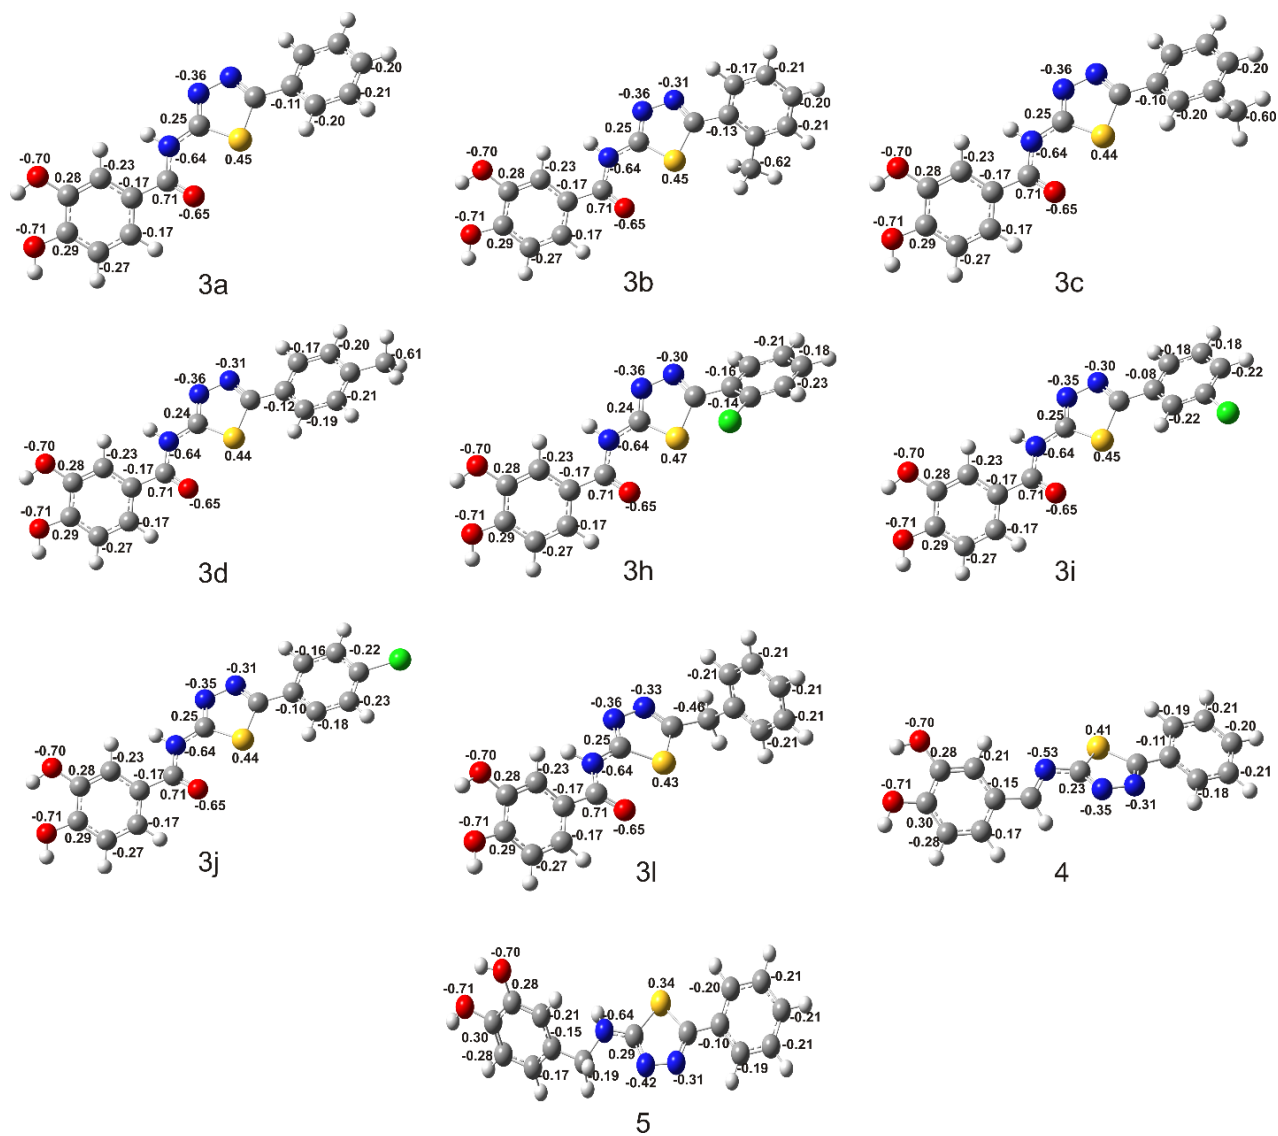

**Figure S35.** Structure of investigated compounds and corresponding atomic charge values

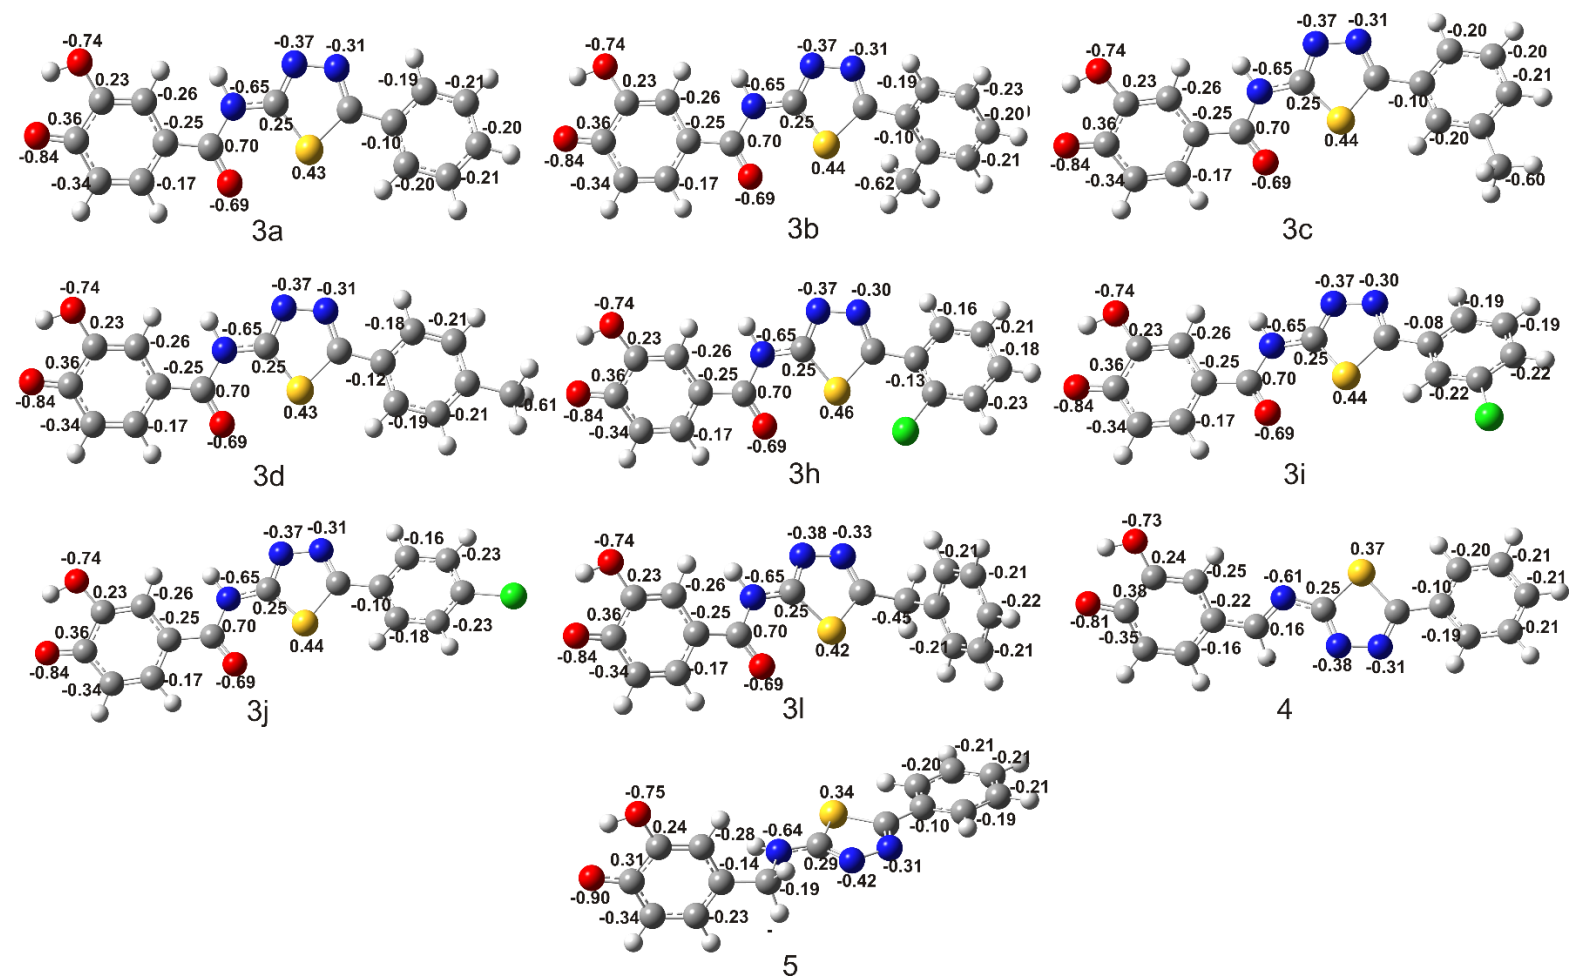

**Figure S36.** Values of atomic charges in all anions obtained from the 3, 4, and 5 in methanol.
